# Supplementary material
Source: PubMed Central journal article supplement (PMC5675742)
Supplement: NIHMS905395-supplement-2.pdf [file NIHMS905395-supplement-2.pdf]

|                                                                                                           | Sample no. 1 | Sample no. 2 | Sample no. 3 | Sample no. 4 | Sample no. 5 | Sample no. 6 | Summary |       |                |
|-----------------------------------------------------------------------------------------------------------|--------------|--------------|--------------|--------------|--------------|--------------|---------|-------|----------------|
|                                                                                                           |              |              |              |              |              |              | Mean    | Total | Standard devia |
| Total number of sequence reads                                                                            | 55897        | 136460       | 135209       | 41435        | 43384        | 105193       | 86263   | 44820 |                |
| Sequence counts after Q30 quality filtering                                                               | 45993        | 112385       | 111368       | 31938        | 35292        | 84552        | 70255   | 37280 |                |
| Median length of quality filtered sequences (without primer binding site and technical adapters)          | 72           | 72           | 72           | 63           | 72           | 72           |         |       |                |
| Sequence counts after OTU clustering and removal of singletons and those that failed to align with PyNASt | 43812        | 104402       | 103257       | 28961        | 32601        | 80982        | 65669   | 34832 |                |
| Sequence counts after removal of unassigned OTUs and cyanobacterial chloroplasts (algal contaminations)   | 27514        | 56719        | 69941        | 20856        | 24654        | 49862        | 41591   | 20080 |                |
| Unique OTU observations                                                                                   | 1298         | 1498         | 1561         | 954          | 892          | 1471         |         | 3405  |                |
| Number of taxa to which OTUs were assigned                                                                | 346          | 352          | 352          | 262          | 266          | 326          |         | 543   |                |

|                                                                                                                    | Sample no. 1          | Sample no. 2          | Sample no. 3          | Sample no. 4          | Sample no. 5          | Sample no. 6          | Summary      |              |                |      |         |       |         |       |      |
|--------------------------------------------------------------------------------------------------------------------|-----------------------|-----------------------|-----------------------|-----------------------|-----------------------|-----------------------|--------------|--------------|----------------|------|---------|-------|---------|-------|------|
| assigned taxa (k: kingdom; p: phylum; c: class; o: order; f: family; g: genus)                                     | Relative abund Counts | Mean relativ | Total count: | Standard devia |      |         |       |         |       |      |
| k__Bacteria;p__Bacteroidetes;c__Flavobacteriia;o__Flavobacteriales;f__Flavobacteriaceae;g__                        | 9,9040                | 2725                  | 10,9628               | 6218                  | 10,5632               | 7388                  | 9,1484       | 1908         | 9,0127         | 2222 | 26,2023 | 13065 | 12,6323 | 33526 | 6,69 |
| k__Bacteria;p__Bacteroidetes;c__Flavobacteriia;o__Flavobacteriales;f__Flavobacteriaceae;Other                      | 8,3012                | 2284                  | 7,5248                | 4268                  | 11,0693               | 7742                  | 3,6105       | 753          | 4,3685         | 1077 | 10,4549 | 5213  | 7,5549  | 21337 | 3,07 |
| k__Bacteria;p__Proteobacteria;c__Alphaproteobacteria;o__Rhodobacterales;f__Rhodobacteraceae;g__                    | 6,9565                | 1914                  | 8,4857                | 4813                  | 6,8100                | 4763                  | 6,7031       | 1398         | 5,7962         | 1429 | 6,3255  | 3154  | 6,8462  | 17471 | 0,91 |
| k__Bacteria;p__Proteobacteria;c__Gammaproteobacteria;o__Vibrionales;f__Pseudoalteromonadaceae;g__Pseudoalteromonas | 6,0115                | 1654                  | 6,6539                | 3774                  | 3,7818                | 2645                  | 1,0213       | 213          | 0,9491         | 234  | 6,6343  | 3308  | 4,1753  | 11828 | 2,69 |
| k__Bacteria;p__Cyanobacteria;c__Oscillatoriothrixaceae;o__Chroococcales;f__Xenococcaceae;g__                       | 4,7976                | 1320                  | 1,3029                | 739                   | 6,6313                | 4638                  | 4,4927       | 937          | 5,3744         | 1325 | 1,7187  | 857   | 4,0529  | 9816  | 2,10 |
| k__Bacteria;p__Proteobacteria;c__Alphaproteobacteria;Other;Other;Other                                             | 2,7150                | 747                   | 2,6411                | 1498                  | 4,7311                | 3309                  | 6,2572       | 1305         | 5,8611         | 1445 | 1,3798  | 688   | 3,9309  | 8992  | 1,97 |
| k__Bacteria;p__Proteobacteria;c__Gammaproteobacteria;o__Oceanospirillales;f__Endozoaicomonaceae;g__                | 2,9730                | 818                   | 3,0554                | 1733                  | 0,9808                | 686                   | 1,9227       | 401          | 4,7944         | 1182 | 2,0617  | 1028  | 2,6313  | 5848  | 1,31 |
| k__Bacteria;p__Proteobacteria;c__Alphaproteobacteria;o__Rhizobiales;Other;Other                                    | 2,7441                | 755                   | 1,8248                | 1035                  | 2,5850                | 1808                  | 3,6536       | 762          | 2,8271         | 697  | 1,5062  | 751   | 2,5235  | 5808  | 0,77 |
| k__Bacteria;p__Bacteroidetes;c__Cytophagia;o__Cytophagales;f__Flammeovirgaceae;g__                                 | 2,0789                | 572                   | 2,3608                | 1339                  | 1,7472                | 1222                  | 2,3159       | 483          | 2,7582         | 680  | 2,0878  | 1041  | 2,2248  | 5337  | 0,34 |
| k__Bacteria;p__Cyanobacteria;c__Synecococcophycidae;o__Pseudanabaenales;f__Pseudanabaenaceae;g__Halomicronema      | 0,9232                | 254                   | 0,5342                | 303                   | 1,3397                | 937                   | 3,8119       | 795          | 5,0093         | 1235 | 0,4673  | 233   | 2,0143  | 3757  | 1,92 |
| k__Bacteria;p__Proteobacteria;c__Alphaproteobacteria;o__Rhodospirillales;f__g__                                    | 2,1843                | 601                   | 5,2734                | 2991                  | 1,9731                | 1380                  | 1,3953       | 291          | 0,9694         | 239  | 0,1604  | 80    | 1,9927  | 5582  | 1,76 |
| k__Bacteria;p__Bacteroidetes;c__Flavobacteriia;o__Flavobacteriales;f__Flavobacteriaceae;g__Maribacter              | 1,6210                | 446                   | 2,4313                | 1379                  | 1,5442                | 1080                  | 1,0980       | 229          | 0,4421         | 109  | 3,0785  | 1535  | 1,7025  | 4778  | 0,94 |
| k__Bacteria;p__Proteobacteria;c__Gammaproteobacteria;Other;Other;Other                                             | 2,1044                | 579                   | 2,7504                | 1560                  | 1,3869                | 970                   | 1,2562       | 262          | 1,2736         | 314  | 1,2294  | 613   | 1,6668  | 4298  | 0,63 |
| k__Bacteria;p__Proteobacteria;c__Gammaproteobacteria;o__Alteromonadales;f__Colwelliaceae;g__                       | 2,3152                | 637                   | 3,3005                | 1872                  | 1,1624                | 813                   | 0,5610       | 117          | 0,5232         | 129  | 1,1752  | 586   | 1,5063  | 4154  | 1,09 |
| k__Bacteria;p__Proteobacteria;c__Gammaproteobacteria;o__Thiotrichales;f__Piscirickettsiaceae;g__                   | 1,2176                | 335                   | 0,5818                | 330                   | 1,7458                | 1221                  | 2,2488       | 469          | 2,2025         | 543  | 0,5756  | 287   | 1,4287  | 3185  | 0,76 |
| k__Bacteria;p__Tenericutes;c__Mollicutes;o__Mycoplasmatales;f__Mycoplasmataceae;g__Mycoplasma                      | 1,2357                | 340                   | 2,2303                | 1265                  | 2,2162                | 1550                  | 0,9781       | 204          | 0,7747         | 191  | 0,4252  | 212   | 1,3100  | 3762  | 0,76 |
| k__Bacteria;p__Proteobacteria;c__Alphaproteobacteria;o__Rhodobacterales;f__Rhodobacteraceae;g__Loktanella          | 1,6937                | 466                   | 2,6975                | 1530                  | 1,3397                | 937                   | 0,6185       | 129          | 0,4218         | 104  | 0,6097  | 304   | 1,2302  | 3470  | 0,87 |
| k__Bacteria;p__Proteobacteria;c__Gammaproteobacteria;o__f__g__                                                     | 1,3157                | 362                   | 0,6188                | 351                   | 1,2839                | 898                   | 1,4816       | 309          | 2,2025         | 543  | 0,4593  | 229   | 1,2270  | 2692  | 0,63 |
| k__Bacteria;p__Cyanobacteria;c__Oscillatoriothrixaceae;o__Chroococcales;Other;Other                                | 1,8681                | 514                   | 0,0599                | 34                    | 3,2299                | 2259                  | 1,1460       | 239          | 0,9329         | 230  | 0,0923  | 46    | 1,2215  | 3322  | 1,20 |
| k__Bacteria;p__Proteobacteria;c__Alphaproteobacteria;o__Rhodobacterales;f__Rhodobacteraceae;Other                  | 1,3484                | 371                   | 1,9940                | 1131                  | 0,9036                | 632                   | 1,3042       | 272          | 0,6814         | 668  | 0,8243  | 411   | 1,1760  | 2985  | 0,48 |
| k__Bacteria;p__Cyanobacteria;Other;Other;Other                                                                     | 0,8250                | 227                   | 0,8163                | 463                   | 0,9908                | 693                   | 1,2514       | 261          | 1,6630         | 410  | 0,3610  | 180   | 0,9846  | 2234  | 0,44 |
| k__Bacteria;p__Proteobacteria;c__Gammaproteobacteria;o__Vibrionales;f__Vibrionaceae;g__Vibrio                      | 1,3520                | 372                   | 1,9006                | 1078                  | 0,9494                | 664                   | 0,5130       | 107          | 0,2677         | 66   | 0,7501  | 374   | 0,9555  | 2661  | 0,59 |
| k__Bacteria;p__Proteobacteria;c__Gammaproteobacteria;o__Alteromonadales;f__OM60;g__                                | 0,7487                | 206                   | 0,4513                | 256                   | 1,2654                | 885                   | 1,3761       | 287          | 1,3750         | 339  | 0,4533  | 226   | 0,9450  | 2199  | 0,45 |
| k__Bacteria;p__Proteobacteria;c__Gammaproteobacteria;o__Thiohalorhabdiales;f__g__                                  | 1,4247                | 392                   | 1,1248                | 638                   | 0,9294                | 650                   | 0,1822       | 38           | 0,0852         | 21   | 1,7749  | 885   | 0,9202  | 2624  | 0,67 |
| k__Bacteria;p__Proteobacteria;c__Epsilonproteobacteria;o__Campylobacteriales;f__Campylobacteraceae;g__Arcobacter   | 1,3339                | 367                   | 2,4154                | 1370                  | 0,6134                | 429                   | 0,2637       | 55           | 0,1988         | 49   | 0,2066  | 103   | 0,8386  | 2373  | 0,89 |
| k__Bacteria;p__Proteobacteria;c__Alphaproteobacteria;o__Rhodobacterales;f__Hyphomonadaceae;g__                     | 0,4761                | 131                   | 0,5466                | 310                   | 0,6077                | 425                   | 1,0549       | 220          | 1,1763         | 290  | 1,0469  | 522   | 0,8181  | 1898  | 0,31 |
| k__Bacteria;p__Bacteroidetes;c__Flavobacteriia;o__Flavobacteriales;f__Flavobacteriaceae;g__Kordia                  | 0,3853                | 106                   | 0,6717                | 381                   | 0,1630                | 114                   | 2,1529       | 449          | 0,3772         | 93   | 0,7882  | 393   | 0,7564  | 1536  | 0,72 |
| k__Bacteria;p__Proteobacteria;c__Alphaproteobacteria;o__Rickettsiales;f__Rickettsiaceae;g__                        | 0,8032                | 221                   | 0,1499                | 85                    | 1,7572                | 1229                  | 0,7192       | 150          | 0,5679         | 140  | 0,2246  | 112   | 0,7037  | 1937  | 0,58 |
| k__Bacteria;p__Proteobacteria;c__Alphaproteobacteria;o__Sphingomonadales;f__Erythrobacteraceae;g__                 | 0,3998                | 110                   | 0,4672                | 265                   | 0,3960                | 277                   | 1,4816       | 309          | 1,3020         | 321  | 0,1203  | 60    | 0,6945  | 1342  | 0,56 |
| k__Bacteria;p__Proteobacteria;c__Betaproteobacteria;Other;Other;Other                                              | 0,5088                | 140                   | 0,4954                | 281                   | 0,2974                | 208                   | 1,1028       | 230          | 1,4237         | 351  | 0,1905  | 95    | 0,6698  | 1305  | 0,49 |
| k__Bacteria;p__Cyanobacteria;c__Nostocophycidae;o__Stigonematales;f__Rivulariaceae;g__Rivularia                    | 0,5161                | 142                   | 0,2468                | 140                   | 0,4647                | 325                   | 0,9638       | 201          | 1,4886         | 367  | 0,3028  | 151   | 0,6638  | 1326  | 0,48 |
| k__Bacteria;p__Bacteroidetes;c__Flavobacteriia;o__Flavobacteriales;f__Flavobacteriaceae;g__Polaribacter            | 0,9377                | 258                   | 0,4496                | 255                   | 0,7335                | 513                   | 0,3692       | 77           | 0,3204         | 79   | 0,8303  | 414   | 0,6068  | 1596  | 0,26 |
| k__Bacteria;p__Bacteroidetes;c__Saprosiriales;o__Saprosiriales;f__Saprosiraceae;g__                                | 0,5088                | 140                   | 0,4619                | 262                   | 0,3675                | 257                   | 0,3260       | 68           | 0,3326         | 82   | 1,6265  | 811   | 0,6039  | 1230  | 0,51 |
| k__Bacteria;p__Proteobacteria;c__Alphaproteobacteria;o__Rhodospirillales;f__Rhodospirillaceae;g__Inquilinus        | 0,2508                | 69                    | 0,1992                | 113                   | 0,5776                | 404                   | 1,0932       | 228          | 1,2817         | 316  | 0,2126  | 106   | 0,6025  | 1266  | 0,48 |
| k__Bacteria;p__Proteobacteria;c__Gammaproteobacteria;o__Oceanospirillales;f__Halomonadaceae;g__Halomonas           | 0,4034                | 111                   | 0,6030                | 342                   | 0,5061                | 354                   | 0,7528       | 157          | 0,8680         | 214  | 0,3309  | 165   | 0,5774  | 1343  | 0,21 |
| k__Bacteria;p__Cyanobacteria;c__Oscillatoriothrixaceae;o__Oscillatoriales;f__Phormidiaceae;Other                   | 0,0800                | 22                    | 0,0300                | 17                    | 0,1301                | 91                    | 1,8508       | 386          | 1,2250         | 302  | 0,0481  | 24    | 0,5607  | 842   | 0,78 |
| k__Bacteria;p__Proteobacteria;c__Gammaproteobacteria;o__Enterobacteriales;f__Enterobacteriaceae;g__Erwinia         | 0,2908                | 80                    | 0,1798                | 102                   | 0,2902                | 203                   | 1,2802       | 267          | 1,1276         | 278  | 0,1344  | 67    | 0,5505  | 997   | 0,51 |
| k__Bacteria;p__Cyanobacteria;c__Oscillatoriothrixaceae;o__Chroococcales;f__Xenococcaceae;Other                     | 0,2799                | 77                    | 0,1798                | 102                   | 0,4003                | 280                   | 1,8508       | 386          | 0,4097         | 101  | 0,1564  | 78    | 0,5462  | 1024  | 0,65 |
| k__Bacteria;p__Cyanobacteria;c__Synecococcophycidae;o__Pseudanabaenales;f__Pseudanabaenaceae;g__                   | 0,5415                | 149                   | 0,2574                | 146                   | 0,6920                | 484                   | 0,9350       | 195          | 0,4259         | 105  | 0,2226  | 111   | 0,5124  | 1190  | 0,27 |
| k__Bacteria;p__Proteobacteria;c__Gammaproteobacteria;o__Alteromonadales;Other;Other                                | 0,6942                | 191                   | 0,3068                | 174                   | 0,4289                | 300                   | 0,7959       | 166          | 0,4867         | 120  | 0,3028  | 151   | 0,5026  | 1102  | 0,20 |
| k__Bacteria;p__Proteobacteria;c__Betaproteobacteria;o__Burkholderiales;f__Comamonadaceae;g__                       | 0,3453                | 95                    | 0,2645                | 150                   | 0,1930                | 135                   | 0,8343       | 174          | 1,1601         | 286  | 0,2006  | 100   | 0,4996  | 940   | 0,40 |
| k__Bacteria;p__Proteobacteria;c__Gammaproteobacteria;o__Alteromonadales;f__Alteromonadaceae;g__Alteromonas         | 0,7778                | 214                   | 0,2521                | 143                   | 0,6863                | 480                   | 0,2445       | 51           | 0,0973         | 24   | 0,7079  | 338   | 0,4560  | 1250  | 0,29 |
| k__Bacteria;p__Bacteroidetes;c__Saprosiriales;o__Saprosiriales;f__Chitinophagaceae;g__                             | 0,3853                | 106                   | 0,2098                | 119                   | 0,2445                | 171                   | 0,6329       | 132          | 0,9938         | 245  | 0,1604  | 80    | 0,4378  | 853   | 0,32 |
| k__Bacteria;p__Proteobacteria;c__Alphaproteobacteria;o__Rhizobiales;f__Phyllobacteriaceae;g__                      | 0,4470                | 123                   | 0,5536                | 314                   | 0,4475                | 313                   | 0,5274       | 110          | 0,1825         | 45   | 0,4172  | 208   | 0,4292  | 1113  | 0,13 |
| k__Bacteria;p__Proteobacteria;c__Alphaproteobacteria;o__Sphingomonadales;f__g__                                    | 0,2253                | 62                    | 0,4020                | 228                   | 0,4489                | 314                   | 0,5610       | 117          | 0,6125         | 151  | 0,2788  | 139   | 0,4214  | 1011  | 0,15 |
| k__Bacteria;p__Proteobacteria;c__Alphaproteobacteria;o__f__g__                                                     | 0,4289                | 118                   | 0,2345                | 133                   | 0,6162                | 431                   | 0,4555       | 95           | 0,5760         | 142  | 0,1584  | 79    | 0,4116  | 998   | 0,18 |
| k__Bacteria;p__Proteobacteria;c__Gammaproteobacteria;o__Thiotrichales;f__Thiotrichaceae;g__Cocleimonas             | 0,3089                | 85                    | 0,1710                | 97                    | 0,5805                | 406                   | 0,2445       | 51           | 0,1501         | 37   | 0,9486  | 473   | 0,4006  | 1149  | 0,31 |
| k__Bacteria;p__Cyanobacteria;c__Nostocophycidae;Other;Other;Other                                                  | 0,0182                | 5                     | 0,0370                | 21                    | 0,1244                | 87                    | 1,1172       | 233          | 1,0465         | 258  | 0,0281  | 14    | 0,3952  | 618   | 0,53 |
| k__Bacteria;p__Bacteroidetes;c__Flavobacteriia;o__Flavobacteriales;f__Flavobacteriaceae;g__Flavobacterium          | 0,1599                | 44                    | 0,2274                | 129                   | 0,2230                | 156                   | 0,6685       | 56           | 0,1704         | 42   | 1,1893  | 593   | 0,3731  | 1020  | 0,40 |
| k__Bacteria;p__Proteobacteria;c__Deltaproteobacteria;o__Desulfobacterales;f__Desulfobulbaceae;g__                  | 0,4289                | 118                   | 1,1989                | 680                   | 0,0944                | 66                    | 0,2062       | 43           | 0,0852         | 21   | 0,0481  | 24    | 0,3436  | 952   | 0,44 |
| k__Bacteria;p__Bacteroidetes;c__Flavobacteriia;o__Flavobacteriales;f__g__                                          | 0,4071                | 112                   | 0,2733                | 155                   | 0,4489                | 314                   | 0,4079       | 10           | 0,1339         | 33   | 0,2739  | 346   | 0,3342  | 970   | 0,23 |
| k__Bacteria;p__Proteobacteria;c__Epsilonproteobacteria;o__Campylobacteriales;f__g__                                | 0,2799                | 77                    | 0,2169                | 123                   | 0,0643                | 45                    | 0,1966       | 41           | 1,0546         | 260  | 0,1604  | 80    | 0,3288  | 626   | 0,36 |
| k__Bacteria;p__Proteobacteria;c__Gammaproteobacteria;o__Chromatiales;f__g__                                        | 0,2435                | 67                    | 0,2415                | 137                   | 0,2445                | 171                   | 0,5993       | 125          | 0,3245         | 80   | 0,2387  | 119   | 0,3153  | 699   | 0,14 |
| k__Bacteria;p__Actinobacteria;c__Acidimicrobia;o__Acidimicrobiales;Other;Other                                     | 0,4470                | 123                   | 0,1552                | 88                    | 0,3760                | 263                   | 0,4076       | 85           | 0,2069         | 51   | 0,2006  | 100   | 0,2989  | 710   | 0,13 |
| k__Bacteria;p__Proteobacteria;c__Deltaproteobacteria;o__Myxococcales;f__Nannocystaceae;g__Plesiocystis             | 0,0800                | 22                    | 0,1922                | 109                   | 0,2759                | 193                   | 0,3356       | 70           | 0,             |      |         |       |         |       |      |

|                                                                                                                  |        |     |        |     |        |     |        |     |        |     |        |     |        |     |      |
|------------------------------------------------------------------------------------------------------------------|--------|-----|--------|-----|--------|-----|--------|-----|--------|-----|--------|-----|--------|-----|------|
| k_Bacteria;p__Proteobacteria;c__Gammaproteobacteria;o__Alteromonadales;f__Alteromonadaeae;Other                  | 0,3598 | 99  | 0,4090 | 232 | 0,3532 | 247 | 0,1007 | 21  | 0,1582 | 39  | 0,3369 | 168 | 0,2863 | 806 | 0,13 |
| k_Bacteria;p__Cyanobacteria;c__Oscillatoriophycideae;o__Oscillatoriales;f__Phormidiaceae;g__                     | 0,1490 | 41  | 0,0282 | 16  | 0,2717 | 190 | 0,2349 | 49  | 0,9329 | 230 | 0,0662 | 33  | 0,2805 | 559 | 0,33 |
| k_Bacteria;p__Proteobacteria;c__Gammaproteobacteria;o__Oceanospirillales;f__Oceanospirillaceae;g__Marinomonas    | 0,4616 | 127 | 0,4443 | 252 | 0,1258 | 88  | 0,0863 | 18  | 0,0608 | 15  | 0,4974 | 248 | 0,2794 | 748 | 0,21 |
| k_Bacteria;p__Planctomycetes;c__Phycisphaerae;o__Phycisphaerales;f__g__                                          | 0,2326 | 64  | 0,2821 | 160 | 0,2073 | 145 | 0,3452 | 72  | 0,5435 | 134 | 0,0341 | 17  | 0,2741 | 592 | 0,17 |
| k_Bacteria;p__Proteobacteria;c__Alphaproteobacteria;o__Rhodobacterales;f__Rhodobacteraceae;g__Rhodovulum         | 0,2653 | 73  | 0,1622 | 92  | 0,3017 | 211 | 0,4171 | 87  | 0,2150 | 53  | 0,2306 | 115 | 0,2653 | 631 | 0,09 |
| k_Bacteria;p__Cyanobacteria;c__Oscillatoriophycideae;Other;Other;Other                                           | 0,2581 | 71  | 0,1657 | 94  | 0,1802 | 126 | 0,3836 | 80  | 0,4421 | 109 | 0,1263 | 63  | 0,2593 | 543 | 0,13 |
| k_Bacteria;p__Proteobacteria;c__Alphaproteobacteria;o__BD7-3;f__g__                                              | 0,3017 | 83  | 0,4108 | 233 | 0,2216 | 155 | 0,2110 | 44  | 0,2839 | 70  | 0,1123 | 56  | 0,2569 | 641 | 0,10 |
| k_Bacteria;p__Proteobacteria;c__Alphaproteobacteria;o__Kordiimonadales;f__Kordiimonadaeae;g__                    | 0,1999 | 55  | 0,0494 | 28  | 0,1387 | 97  | 0,3165 | 66  | 0,5841 | 144 | 0,2407 | 120 | 0,2549 | 510 | 0,19 |
| k_Bacteria;p__Bacteroidetes;c__Flavobacteriia;o__Flavobacteriales;f__Flavobacteriaceae;g__Tenacibaculum          | 0,0800 | 22  | 0,1146 | 65  | 0,2474 | 173 | 0,0479 | 10  | 0,0162 | 4   | 1,8088 | 503 | 0,2525 | 777 | 0,38 |
| k_Bacteria;p__Actinobacteria;c__Acidimicrobia;o__Acidimicrobiales;f__g__                                         | 0,2544 | 70  | 0,1093 | 62  | 0,3031 | 212 | 0,4459 | 93  | 0,3326 | 82  | 0,0501 | 25  | 0,2492 | 544 | 0,15 |
| k_Bacteria;p__Proteobacteria;c__Gammaproteobacteria;o__Oceanospirillales;f__Oceanospirillaceae;Other             | 0,3744 | 103 | 0,2010 | 114 | 0,5691 | 398 | 0,0959 | 20  | 0,1014 | 25  | 0,1464 | 73  | 0,2480 | 733 | 0,19 |
| k_Bacteria;p__Cyanobacteria;c__Synechococcophycideae;o__Pseudanabaenales;f__Pseudanabaenaceae;g__Leptolyngbya    | 0,1854 | 51  | 0,0423 | 24  | 0,2002 | 140 | 0,4939 | 103 | 0,4746 | 117 | 0,0882 | 44  | 0,2474 | 479 | 0,19 |
| k_Bacteria;p__Proteobacteria;c__Betaproteobacteria;o__Burkholderiales;f__Burkholderiaceae;g__Burkholderia        | 0,4325 | 119 | 0,2045 | 116 | 0,0815 | 57  | 0,3308 | 69  | 0,3934 | 97  | 0,0241 | 12  | 0,2445 | 470 | 0,17 |
| k_Bacteria;p__Cyanobacteria;c__Gloeobacterophycideae;o__Gloeobacterales;f__Gloeobacteraceae;g__Gloeobacter       | 0,0545 | 15  | 0,0282 | 16  | 0,0958 | 67  | 0,7240 | 151 | 0,4827 | 119 | 0,0802 | 40  | 0,2442 | 408 | 0,29 |
| k_Bacteria;p__Proteobacteria;c__Gammaproteobacteria;o__Thiotrichales;f__Thiotrichaceae;g__                       | 0,2835 | 78  | 0,2363 | 134 | 0,2474 | 173 | 0,1295 | 27  | 0,0649 | 16  | 0,4914 | 245 | 0,2421 | 673 | 0,15 |
| k_Bacteria;p__Proteobacteria;c__Gammaproteobacteria;o__Legionellales;f__Francisellaceae;g__                      | 0,3017 | 83  | 0,1657 | 94  | 0,0743 | 52  | 0,4267 | 89  | 0,2069 | 51  | 0,0842 | 42  | 0,2099 | 411 | 0,14 |
| k_Bacteria;p__Proteobacteria;c__Gammaproteobacteria;o__Oceanospirillales;Other;Other                             | 0,0545 | 15  | 0,0511 | 29  | 0,0529 | 37  | 1,0357 | 216 | 0,0203 | 5   | 0,0361 | 18  | 0,2084 | 320 | 0,41 |
| k_Bacteria;p__Proteobacteria;c__Gammaproteobacteria;o__Alteromonadales;f__Shewanellaceae;g__Shewanella           | 0,1890 | 52  | 0,2345 | 133 | 0,1816 | 127 | 0,1247 | 26  | 0,1704 | 42  | 0,3289 | 164 | 0,2048 | 544 | 0,07 |
| k_Bacteria;p__Proteobacteria;c__Gammaproteobacteria;o__Thiotrichales;f__Thiotrichaceae;g__Leucothrix             | 0,0763 | 21  | 0,0846 | 48  | 0,1830 | 128 | 0,0384 | 8   | 0,0000 | 0   | 0,8483 | 421 | 0,2044 | 626 | 0,32 |
| k_Bacteria;p__Proteobacteria;c__Alphaproteobacteria;o__Rhodobacterales;f__Rhodobacteraceae;g__Thalassobacter     | 0,4071 | 112 | 0,1499 | 85  | 0,3517 | 246 | 0,0719 | 15  | 0,0000 | 0   | 0,2286 | 114 | 0,2015 | 572 | 0,16 |
| k_Bacteria;p__Proteobacteria;c__Gammaproteobacteria;o__Pseudomonadales;f__Moraxellaceae;Other                    | 0,1054 | 29  | 0,1481 | 84  | 0,1072 | 75  | 0,0096 | 2   | 0,7585 | 187 | 0,0742 | 37  | 0,2005 | 414 | 0,28 |
| k_Bacteria;p__Proteobacteria;c__Alphaproteobacteria;o__Rhodospirillales;f__Rhodospirillaceae;g__                 | 0,0763 | 21  | 0,1816 | 103 | 0,2145 | 150 | 0,2877 | 60  | 0,4016 | 99  | 0,0201 | 10  | 0,1969 | 443 | 0,14 |
| k_Bacteria;p__Actinobacteria;c__Actinobacteria;o__Actinomycetales;f__Propionibacteriaceae;g__Propionibacterium   | 0,1308 | 36  | 0,0547 | 31  | 0,0743 | 52  | 0,4507 | 94  | 0,3894 | 96  | 0,0281 | 14  | 0,1880 | 323 | 0,18 |
| k_Bacteria;p__Actinobacteria;c__Acidimicrobia;o__Acidimicrobiales;f__C111;g__                                    | 0,2108 | 58  | 0,5554 | 315 | 0,1387 | 97  | 0,0048 | 1   | 0,0243 | 6   | 0,1885 | 94  | 0,1871 | 571 | 0,20 |
| k_Bacteria;p__Proteobacteria;c__Deltaproteobacteria;o__Myxococcales;f__g__                                       | 0,2435 | 67  | 0,3491 | 198 | 0,1029 | 72  | 0,1822 | 38  | 0,0649 | 16  | 0,1143 | 57  | 0,1762 | 448 | 0,11 |
| k_Bacteria;p__Planctomycetes;c__Planctomycetia;o__Pirellulales;f__Pirellulaceae;g__                              | 0,1417 | 39  | 0,2045 | 116 | 0,2445 | 171 | 0,2062 | 43  | 0,1257 | 31  | 0,1304 | 65  | 0,1755 | 465 | 0,05 |
| k_Bacteria;p__Proteobacteria;c__Gammaproteobacteria;o__Pseudomonadales;f__Moraxellaceae;g__Acinetobacter         | 0,1745 | 48  | 0,0917 | 52  | 0,0686 | 48  | 0,2014 | 42  | 0,4421 | 109 | 0,0722 | 36  | 0,1751 | 335 | 0,14 |
| k_Bacteria;p__Proteobacteria;c__Gammaproteobacteria;o__Thiotrichales;f__Piscirickettsiaceae;g__Methylophaga      | 0,2762 | 76  | 0,1904 | 108 | 0,2502 | 175 | 0,0000 | 0   | 0,0365 | 9   | 0,2788 | 139 | 0,1720 | 507 | 0,12 |
| k_Bacteria;p__Proteobacteria;c__Gammaproteobacteria;o__Oceanospirillales;f__Oceanospirillaceae;g__               | 0,1090 | 30  | 0,2433 | 138 | 0,0772 | 54  | 0,0000 | 0   | 0,1217 | 30  | 0,4232 | 211 | 0,1624 | 463 | 0,15 |
| k_Bacteria;p__Firmicutes;c__Bacilli;o__Bacillales;f__Staphylococcales;g__Staphylococcus                          | 0,1563 | 43  | 0,0247 | 14  | 0,0372 | 26  | 0,1151 | 24  | 0,5922 | 146 | 0,0100 | 5   | 0,1559 | 258 | 0,22 |
| k_Bacteria;p__Proteobacteria;c__Gammaproteobacteria;o__Enterobacteriales;f__Enterobacteriaceae;Other             | 0,2726 | 75  | 0,2433 | 138 | 0,1187 | 83  | 0,1774 | 37  | 0,0284 | 7   | 0,0943 | 47  | 0,1558 | 387 | 0,09 |
| k_Bacteria;p__Proteobacteria;c__Betaproteobacteria;o__Burkholderiales;f__Oxalobacteraceae;g__Ralstonia           | 0,2181 | 60  | 0,1516 | 86  | 0,0615 | 43  | 0,3021 | 63  | 0,1663 | 41  | 0,0221 | 11  | 0,1536 | 304 | 0,10 |
| k_Bacteria;p__Cyanobacteria;c__Oscillatoriophycideae;o__Chroococcales;f__Cyanobacteriaceae;g__                   | 0,0836 | 23  | 0,0353 | 20  | 0,1273 | 89  | 0,0000 | 0   | 0,4421 | 109 | 0,2106 | 105 | 0,1498 | 346 | 0,16 |
| k_Bacteria;p__Verrucomicrobia;c__Verrucomicrobiae;o__Verrucomicrobiales;f__Verrucomicrobiaceae;g__Persicirhabdus | 0,1745 | 48  | 0,1604 | 91  | 0,3374 | 236 | 0,0479 | 10  | 0,0122 | 3   | 0,1484 | 74  | 0,1468 | 462 | 0,11 |
| k_Bacteria;p__Proteobacteria;c__Gammaproteobacteria;o__Alteromonadales;f__Colwelliaceae;g__Thalassomonas         | 0,0945 | 26  | 0,1781 | 101 | 0,0515 | 36  | 0,2062 | 43  | 0,2555 | 63  | 0,0802 | 40  | 0,1443 | 309 | 0,08 |
| k_Bacteria;p__Proteobacteria;c__Gammaproteobacteria;o__Enterobacteriales;f__Enterobacteriaceae;g__               | 0,0909 | 25  | 0,1463 | 83  | 0,0701 | 49  | 0,2589 | 54  | 0,1217 | 30  | 0,1725 | 86  | 0,1434 | 327 | 0,07 |
| k_Bacteria;p__Planctomycetes;c__Phycisphaerae;o__Phycisphaerales;f__Phycisphaeraeae;g__                          | 0,0472 | 13  | 0,0934 | 53  | 0,1730 | 121 | 0,1343 | 28  | 0,3610 | 89  | 0,0341 | 17  | 0,1405 | 321 | 0,12 |
| k_Bacteria;p__Bacteroidetes;c__Bacteroidia;o__Bacteroidales;f__g__                                               | 0,1381 | 38  | 0,0511 | 29  | 0,2273 | 159 | 0,2685 | 56  | 0,0041 | 1   | 0,1524 | 76  | 0,1403 | 359 | 0,10 |
| k_Bacteria;p__Verrucomicrobia;c__Verrucomicrobiae;o__Verrucomicrobiales;f__Verrucomicrobiaceae;g__Rubritalea     | 0,2799 | 77  | 0,0529 | 30  | 0,1430 | 100 | 0,2110 | 44  | 0,1014 | 25  | 0,0401 | 20  | 0,1380 | 296 | 0,09 |
| k_Bacteria;p__Cyanobacteria;c__Oscillatoriophycideae;o__Chroococcales;f__Cyanobacteriaceae;g__                   | 0,3162 | 87  | 0,0000 | 0   | 0,3975 | 278 | 0,0000 | 0   | 0,0690 | 17  | 0,0100 | 5   | 0,1321 | 287 | 0,18 |
| k_Bacteria;p__Bacteroidetes;c__Flavobacteriia;o__Flavobacteriales;f__Flavobacteriaceae;g__Winogradskyella        | 0,1526 | 42  | 0,2345 | 133 | 0,0958 | 67  | 0,0959 | 20  | 0,0649 | 16  | 0,1464 | 73  | 0,1317 | 351 | 0,06 |
| k_Bacteria;p__Proteobacteria;c__Alphaproteobacteria;o__Sphingomonadales;f__Erythrobacteraceae;g__Erythrobacter   | 0,0545 | 15  | 0,0846 | 48  | 0,0629 | 44  | 0,2685 | 56  | 0,2434 | 60  | 0,0722 | 36  | 0,1310 | 259 | 0,10 |
| k_Bacteria;p__Proteobacteria;c__Alphaproteobacteria;o__Kiloniellales;f__g__                                      | 0,0691 | 19  | 0,0617 | 35  | 0,1230 | 86  | 0,1630 | 34  | 0,3002 | 74  | 0,0341 | 17  | 0,1252 | 265 | 0,10 |
| k_Bacteria;p__Proteobacteria;c__Gammaproteobacteria;o__Legionellales;f__Coxiellaceae;g__                         | 0,0945 | 26  | 0,0846 | 48  | 0,1473 | 103 | 0,1582 | 33  | 0,2190 | 54  | 0,0401 | 20  | 0,1240 | 284 | 0,06 |
| k_Bacteria;p__Bacteroidetes;c__Flavobacteriia;o__Flavobacteriales;f__Cryomorphaceae;g__Brumimicrobium            | 0,0254 | 7   | 0,0441 | 25  | 0,0500 | 35  | 0,0336 | 7   | 0,0568 | 14  | 0,5214 | 260 | 0,1219 | 348 | 0,20 |
| k_Bacteria;p__Cyanobacteria;c__Synechococcophycideae;o__Pseudanabaenales;f__Pseudanabaenaceae;Other              | 0,1563 | 43  | 0,0758 | 43  | 0,0472 | 33  | 0,2493 | 52  | 0,1785 | 44  | 0,0241 | 12  | 0,1219 | 227 | 0,09 |
| k_Bacteria;p__Proteobacteria;c__Alphaproteobacteria;o__Rhizobiales;f__Hyphomicrobiaceae;g__                      | 0,1490 | 41  | 0,0934 | 53  | 0,2402 | 168 | 0,1103 | 23  | 0,0690 | 17  | 0,0602 | 30  | 0,1203 | 332 | 0,07 |
| k_Bacteria;p__Bacteroidetes;c__Flavobacteriia;o__Flavobacteriales;f__Flavobacteriaceae;g__Mesonia                | 0,1745 | 48  | 0,1393 | 79  | 0,1244 | 87  | 0,0240 | 5   | 0,0284 | 7   | 0,2086 | 104 | 0,1165 | 330 | 0,08 |
| k_Bacteria;p__Bacteroidetes;c__[Saprosiprae];o__[Saprosiprales];f__Chitinophagaceae;g__Sedimimicrobium           | 0,0654 | 18  | 0,0740 | 42  | 0,0972 | 68  | 0,1678 | 35  | 0,2312 | 57  | 0,0602 | 30  | 0,1160 | 250 | 0,07 |
| k_Bacteria;p__Bacteroidetes;c__Flavobacteriia;o__Flavobacteriales;f__Cryomorphaceae;g__Fluviicola                | 0,0036 | 1   | 0,0194 | 11  | 0,0057 | 4   | 0,0000 | 0   | 0,0000 | 0   | 0,6498 | 324 | 0,1131 | 340 | 0,26 |
| k_Bacteria;p__Proteobacteria;c__Gammaproteobacteria;o__HTCC2188;f__HTCC2089;g__                                  | 0,1417 | 39  | 0,1763 | 100 | 0,0715 | 50  | 0,0240 | 5   | 0,1298 | 32  | 0,1344 | 67  | 0,1129 | 293 | 0,06 |
| k_Bacteria;p__Bacteroidetes;c__Cytophagia;o__Cytophagales;f__Flammeovirgaceae;g__Fulvivirga                      | 0,1236 | 34  | 0,1975 | 112 | 0,1130 | 79  | 0,0288 | 6   | 0,1988 | 49  | 0,0160 | 8   | 0,1129 | 288 | 0,08 |
| k_Bacteria;p__Planctomycetes;c__OM190;o__CL500-15;f__g__                                                         | 0,1018 | 28  | 0,1640 | 93  | 0,1273 | 89  | 0,0527 | 11  | 0,1420 | 35  | 0,0862 | 43  | 0,1123 | 299 | 0,04 |
| k_Bacteria;p__Acidobacteria;c__Solibacteres;o__Solibacterales;f__PAUC26;g__                                      | 0,0836 | 23  | 0,1217 | 69  | 0,1673 | 117 | 0,1438 | 30  | 0,1217 | 30  | 0,0140 | 7   | 0,1087 | 276 | 0,05 |
| k_Bacteria;p__Proteobacteria;c__Deltaproteobacteria;o__NB1-j;f__JT38;g__                                         | 0,1127 | 31  | 0,0705 | 40  | 0,0743 | 52  | 0,1678 | 35  | 0,1176 | 29  | 0,1003 | 50  | 0,1072 | 237 | 0,04 |
| k_Bacteria;p__Chlamydiae;c__Chlamydiae;o__Chlamydiales;f__Simkaniaeae;g__Simkania                                | 0,0727 | 20  | 0,1305 | 74  | 0,1072 | 75  | 0,0336 | 7   | 0,2920 | 72  | 0,0060 | 3   | 0,1070 | 251 | 0,10 |
| k_Bacteria;p__Planctomycetes;c__Planctomycetia;o__Planctomycetales;f__Planctomycetaceae;g__Planctomycetes        | 0,0545 | 15  | 0,1305 | 74  | 0,0772 | 54  | 0,1678 | 35  | 0,1825 | 45  | 0,0140 | 7   | 0,1044 | 230 | 0,07 |
| k_Bacteria;p__Proteobacteria;c__Gammaproteobacteria;o__[Marinicellales];f__[Marinicellaceae];g__Marinicella      | 0,0472 | 13  | 0,1040 | 59  | 0,1330 | 93  | 0,0527 | 11  | 0,0973 | 24  | 0,1865 | 93  | 0,1035 | 293 | 0,05 |
| k_Bacteria;p__Acidobacteria;c__Sva0725;o__Sva0725;f__g__                                                         | 0,1526 | 42  | 0,0317 | 18  | 0,1644 | 115 | 0,1486 | 31  | 0,0324 | 8   | 0,0782 | 39  | 0,1014 | 253 | 0,06 |
| k_Bacteria;p__Firmicutes;c__Clostridia;o__Clostridiales;Other;Other                                              | 0,1272 | 35  | 0,1675 | 95  | 0,1187 | 83  | 0,0000 | 0   | 0,0284 | 7   | 0,1584 | 79  | 0,1000 | 299 | 0,07 |
| k_Bacteria;p__Proteobacteria;c__Gammaproteobacteria;o__HTCC2188;f__HTCC2089;Other                                | 0,1381 | 38  | 0,0635 | 36  | 0,0901 | 63  | 0,1343 | 28  | 0,0243 | 6   | 0,1243 | 62  | 0,0958 | 233 | 0,05 |
| k_Bacteria;p__Bacteroidetes;c__Gammaproteobacteria;o__Alteromonadales;f__Alteromonadaeae;g__Spongibacter         | 0,0800 | 22  | 0,0159 | 9   | 0,1287 | 90  | 0,1822 | 38  | 0,1663 | 41  | 0,0000 | 0   | 0,0955 | 200 | 0,08 |
| k_Bacteria;p__Proteobacteria;c__Gammaproteobacteria;o__Alteromonadales;f__OM60;Other                             | 0,0109 | 3   | 0,1164 | 66  | 0,0758 | 53  | 0,0144 | 3   | 0,0081 | 2   | 0,3329 | 166 | 0,0931 | 293 | 0,13 |
| k_Bacteria;p__Proteobacteria;c__Gammaproteobacteria;o__HOC36;f__g__                                              | 0,0618 | 17  | 0,1234 | 70  | 0,0157 | 11  | 0,1247 | 26  | 0,2231 | 55  | 0,0080 | 4   | 0,0928 | 183 | 0,08 |
| k_Bacteria;p__Bacteroidetes;c__Cytophagia;o__Cytophagales;f__Flammeovirgaceae;g__Roseivirga                      | 0,0582 | 16  | 0,0582 | 33  | 0,0958 | 67  | 0,1199 | 25  | 0,1582 | 29  | 0,0602 | 30  | 0,0917 | 210 | 0,04 |
| k_Bacteria;p__Bacteroidetes;c__Flavobacteriia;o__Flavobacteriales;f__Cryomorphaceae;Other                        | 0,0872 | 24  | 0,1375 | 78  | 0,0200 | 14  | 0,0479 | 10  | 0,1014 | 25  | 0,1424 | 71  | 0,0894 | 222 | 0,05 |
| k_Bacteria;p__Verrucomicrobia;c__Verrucomicrobiae;o__Verrucomicrobiales;f__Verrucomicrobiaceae;g__               | 0,1090 | 30  | 0,1040 | 59  | 0,0929 | 65  | 0,0527 | 11  | 0,0608 | 15  | 0,1143 | 57  | 0,0890 | 237 | 0,03 |
| k_Bacteria;p__Bacteroidetes;c__Flavobacteriia;o__Flavobacteriales;f__Cryomorphaceae;g__                          | 0,0291 | 8   | 0,0529 | 30  | 0,0472 | 33  | 0,0000 | 0   | 0,0284 | 7   | 0,3750 | 187 | 0,0888 | 265 | 0,14 |
| k_B                                                                                                              |        |     |        |     |        |     |        |     |        |     |        |     |        |     |      |

|                                                                                                               |        |    |        |     |        |    |        |    |        |    |        |     |        |     |      |
|---------------------------------------------------------------------------------------------------------------|--------|----|--------|-----|--------|----|--------|----|--------|----|--------|-----|--------|-----|------|
| k_Bacteria;p_Bacteroidetes;c_[Saprosirae];o_[Saprosirales];f_Saprosiraceae;g_Lewinella                        | 0,0254 | 7  | 0,0247 | 14  | 0,0500 | 35 | 0,0048 | 1  | 0,0162 | 4  | 0,3510 | 175 | 0,0787 | 236 | 0,13 |
| k_Bacteria;p_Proteobacteria;c_Gammaproteobacteria;o_Oceanospirillales;f_Oceanospirillaceae;g_Oleibacter       | 0,0800 | 22 | 0,0864 | 49  | 0,0100 | 7  | 0,0096 | 2  | 0,2190 | 54 | 0,0662 | 33  | 0,0785 | 167 | 0,08 |
| k_Bacteria;p_Proteobacteria;c_Alphaproteobacteria;o_Sphingomonadales;f_Sphingomonadaceae;Other                | 0,1054 | 29 | 0,0194 | 11  | 0,1144 | 80 | 0,1055 | 22 | 0,0406 | 10 | 0,0742 | 37  | 0,0766 | 189 | 0,04 |
| k_Bacteria;p_Proteobacteria;c_Gammaproteobacteria;o_[Marinicellales];f_[Marinicellaceae];g__                  | 0,0145 | 4  | 0,0035 | 2   | 0,0415 | 29 | 0,2541 | 53 | 0,1136 | 28 | 0,0281 | 14  | 0,0759 | 130 | 0,10 |
| k_Bacteria;p_Verrucomicrobia;c_Verrucomicrobiae;o_Verrucomicrobiales;f_Verrucomicrobiaceae;g_Verrucomicrobium | 0,0545 | 15 | 0,0970 | 55  | 0,0629 | 44 | 0,1007 | 21 | 0,0284 | 7  | 0,1003 | 50  | 0,0740 | 192 | 0,03 |
| k_Bacteria;p_Firmicutes;c_Bacilli;o_Lactobacillales;f_Streptococcaceae;g_Streptococcus                        | 0,0691 | 19 | 0,0123 | 7   | 0,0686 | 48 | 0,1007 | 21 | 0,1541 | 38 | 0,0341 | 17  | 0,0732 | 150 | 0,05 |
| k_Bacteria;p_Proteobacteria;c_Gammaproteobacteria;o_Vibrionales;f_Vibrionaceae;Other                          | 0,0909 | 25 | 0,1005 | 57  | 0,0400 | 28 | 0,0288 | 6  | 0,0284 | 7  | 0,1083 | 54  | 0,0661 | 177 | 0,04 |
| k_Bacteria;p_Actinobacteria;c_Acidimicrobia;o_Acidimicrobiales;f_JdFBG_Bact_g__                               | 0,0618 | 17 | 0,1375 | 78  | 0,1358 | 95 | 0,0000 | 0  | 0,0162 | 4  | 0,0441 | 22  | 0,0659 | 216 | 0,06 |
| k_Bacteria;p_Proteobacteria;c_Gammaproteobacteria;o_Alteromonadales;f_Alteromonadaceae;g_HTCC2207             | 0,0800 | 22 | 0,2415 | 137 | 0,0000 | 0  | 0,0384 | 8  | 0,0243 | 6  | 0,0060 | 3   | 0,0650 | 176 | 0,09 |
| k_Bacteria;p_Bacteroidetes;c_[Saprosirae];o_[Saprosirales];f_g__                                              | 0,0363 | 10 | 0,0247 | 14  | 0,0686 | 48 | 0,0000 | 0  | 0,0203 | 5  | 0,2326 | 116 | 0,0638 | 193 | 0,09 |
| k_Bacteria;p_Verrucomicrobia;c_[Methylacidiphilae];o_Methylacidiphilales;f_LD19;g__                           | 0,0182 | 5  | 0,0000 | 0   | 0,0715 | 50 | 0,1103 | 23 | 0,0811 | 20 | 0,1003 | 50  | 0,0636 | 148 | 0,04 |
| k_Bacteria;p_Proteobacteria;c_Betaproteobacteria;o_Burkholderiales;f_Comamonadaceae;Other                     | 0,1163 | 32 | 0,0370 | 21  | 0,0143 | 10 | 0,0479 | 10 | 0,1339 | 33 | 0,0180 | 9   | 0,0612 | 115 | 0,05 |
| k_Bacteria;p_Firmicutes;c_Clostridia;o_Clostridiales;f_[Tissierellaceae];g_Anaerococcus                       | 0,0763 | 21 | 0,0176 | 10  | 0,0214 | 15 | 0,1390 | 29 | 0,0730 | 18 | 0,0341 | 17  | 0,0603 | 110 | 0,05 |
| k_Bacteria;p_Verrucomicrobia;c_Opitutae;o_[Pelagicoccales];f_[Pelagicocaceae];g_Pelagicoccus                  | 0,0727 | 20 | 0,0088 | 5   | 0,0257 | 18 | 0,0767 | 16 | 0,1541 | 38 | 0,0201 | 10  | 0,0597 | 107 | 0,05 |
| k_Bacteria;p_Bacteroidetes;c_Cytophagia;o_Cytophagales;f_Flammeovirgaceae;Other                               | 0,0654 | 18 | 0,0035 | 2   | 0,0829 | 58 | 0,0527 | 11 | 0,0406 | 10 | 0,1083 | 54  | 0,0589 | 153 | 0,04 |
| k_Bacteria;p_Proteobacteria;c_Alphaproteobacteria;o_Rhodobacterales;f_Rhodobacteraceae;g-Octadecabacter       | 0,0981 | 27 | 0,1745 | 99  | 0,0229 | 16 | 0,0144 | 3  | 0,0000 | 0  | 0,0401 | 20  | 0,0583 | 165 | 0,07 |
| k_Bacteria;p_Verrucomicrobia;c_Opitutae;o_Puniciceoccales;f_Puniciceocaceae;g_Coraliomargarita                | 0,1199 | 33 | 0,0882 | 50  | 0,0543 | 38 | 0,0575 | 12 | 0,0000 | 0  | 0,0301 | 15  | 0,0583 | 148 | 0,04 |
| k_Bacteria;p_Proteobacteria;c_Gammaproteobacteria;o_Thiotrichales;f_Piscirickettsiaceae;g_Thiomicrospira      | 0,0000 | 0  | 0,0194 | 11  | 0,0057 | 4  | 0,0240 | 5  | 0,0000 | 0  | 0,2908 | 145 | 0,0566 | 165 | 0,12 |
| k_Bacteria;p_Actinobacteria;c_Actinobacteria;o_Actinomycetales;f_Corynebacteriaceae;g_Corynebacterium         | 0,0763 | 21 | 0,0159 | 9   | 0,0243 | 17 | 0,1774 | 37 | 0,0406 | 10 | 0,0000 | 0   | 0,0557 | 94  | 0,07 |
| k_Bacteria;p_Proteobacteria;c_Alphaproteobacteria;o_Sphingomonadales;f_Sphingomonadaceae;g__                  | 0,0800 | 22 | 0,0176 | 10  | 0,1172 | 82 | 0,0000 | 0  | 0,0649 | 16 | 0,0441 | 22  | 0,0540 | 152 | 0,04 |
| k_Bacteria;p_Proteobacteria;c_Gammaproteobacteria;o_Pseudomonadales;f_Pseudomonadaceae;g_Pseudomonas          | 0,0327 | 9  | 0,0599 | 34  | 0,0758 | 53 | 0,0384 | 8  | 0,0203 | 5  | 0,0802 | 40  | 0,0512 | 149 | 0,02 |
| k_Bacteria;p_Proteobacteria;Other;Other;Other                                                                 | 0,0291 | 8  | 0,0071 | 4   | 0,0014 | 1  | 0,1582 | 33 | 0,0973 | 24 | 0,0100 | 5   | 0,0505 | 75  | 0,06 |
| k_Bacteria;p_Proteobacteria;c_Gammaproteobacteria;o_Pseudomonadales;f_Moraxellaceae;g_Psychrobacter           | 0,1308 | 36 | 0,0617 | 35  | 0,0214 | 15 | 0,0000 | 0  | 0,0446 | 11 | 0,0441 | 22  | 0,0505 | 119 | 0,04 |
| k_Bacteria;p_Verrucomicrobia;c_Opitutae;o_f_g__                                                               | 0,0618 | 17 | 0,1446 | 82  | 0,0315 | 22 | 0,0144 | 3  | 0,0365 | 9  | 0,0080 | 4   | 0,0495 | 137 | 0,05 |
| k_Bacteria;p_Spirochaetes;c_[Leptosirae];o_[Leptosirales];f_Leptosiraceae;g_Leptonema                         | 0,0291 | 8  | 0,0388 | 22  | 0,1230 | 86 | 0,1007 | 21 | 0,0000 | 0  | 0,0020 | 1   | 0,0489 | 138 | 0,05 |
| k_Bacteria;p_Proteobacteria;c_Epsilonproteobacteria;o_Campylobacterales;f_Helicobacteraceae;g__               | 0,0073 | 2  | 0,0476 | 27  | 0,0071 | 5  | 0,0096 | 2  | 0,1785 | 44 | 0,0401 | 20  | 0,0484 | 100 | 0,07 |
| k_Bacteria;p_Proteobacteria;c_Gammaproteobacteria;o_Oceanospirillales;f_Alcanivoraceae;g_Alcanivorax          | 0,1054 | 29 | 0,0529 | 30  | 0,0901 | 63 | 0,0048 | 1  | 0,0365 | 9  | 0,0000 | 0   | 0,0483 | 132 | 0,04 |
| k_Bacteria;p_Proteobacteria;c_Gammaproteobacteria;o_Alteromonadales;f_Colwelliaceae;Other                     | 0,0472 | 13 | 0,0617 | 35  | 0,0329 | 23 | 0,0384 | 8  | 0,0446 | 11 | 0,0642 | 32  | 0,0482 | 122 | 0,01 |
| k_Bacteria;p_Cyanobacteria;c_o_f_g__                                                                          | 0,0218 | 6  | 0,0899 | 51  | 0,0429 | 30 | 0,0671 | 14 | 0,0365 | 9  | 0,0301 | 15  | 0,0481 | 125 | 0,03 |
| k_Bacteria;p_Verrucomicrobia;c_Opitutae;o_[Cerasicoccales];f_[Cerasicocaceae];g__                             | 0,0218 | 6  | 0,0458 | 26  | 0,1244 | 87 | 0,0863 | 18 | 0,0081 | 2  | 0,0000 | 0   | 0,0477 | 139 | 0,05 |
| k_Bacteria;p_Bacteroidetes;c_Flavobacteria;o_Flavobacteriales;Other;Other                                     | 0,0691 | 19 | 0,0335 | 19  | 0,0729 | 51 | 0,0336 | 7  | 0,0649 | 16 | 0,0080 | 4   | 0,0470 | 116 | 0,03 |
| k_Bacteria;p_Proteobacteria;c_Alphaproteobacteria;o_Rhizobiales;f_g__                                         | 0,0400 | 11 | 0,0159 | 9   | 0,0858 | 60 | 0,0767 | 16 | 0,0446 | 11 | 0,0120 | 6   | 0,0458 | 113 | 0,03 |
| k_Bacteria;p_Chlamydiae;c_Chlamydia;o_Chlamydiales;f_Simkaniaceae;Other                                       | 0,0545 | 15 | 0,1604 | 91  | 0,0186 | 13 | 0,0144 | 3  | 0,0000 | 0  | 0,0261 | 13  | 0,0457 | 135 | 0,06 |
| k_Bacteria;p_Tenericutes;c_Mollicutes;o_Mycoplasmatales;f_Mycoplasmataceae;g_Candidatus Hepatoplasma          | 0,0472 | 13 | 0,0882 | 50  | 0,0272 | 19 | 0,0527 | 11 | 0,0284 | 7  | 0,0281 | 14  | 0,0453 | 114 | 0,02 |
| k_Bacteria;p_Chloroflexi;c_Anaerolineae;o_SBR1031;f_A4b;g__                                                   | 0,1018 | 28 | 0,1128 | 64  | 0,0200 | 14 | 0,0000 | 0  | 0,0324 | 8  | 0,0000 | 1   | 0,0448 | 115 | 0,05 |
| k_Bacteria;p_Proteobacteria;c_Gammaproteobacteria;o_Alteromonadales;f_HTCC2188;g_HTCC                         | 0,0582 | 16 | 0,0511 | 29  | 0,0758 | 53 | 0,0048 | 1  | 0,0649 | 16 | 0,0140 | 7   | 0,0448 | 122 | 0,03 |
| k_Bacteria;p_Proteobacteria;c_Betaproteobacteria;o_Burkholderiales;Other;Other                                | 0,0763 | 21 | 0,0264 | 15  | 0,0129 | 9  | 0,0575 | 12 | 0,0649 | 16 | 0,0201 | 10  | 0,0430 | 83  | 0,03 |
| k_Bacteria;p_Proteobacteria;c_Gammaproteobacteria;o_Thiotrichales;f_Thiotrichaceae;g_Thiothrix                | 0,0545 | 15 | 0,0458 | 26  | 0,0243 | 17 | 0,0000 | 0  | 0,0000 | 0  | 0,1304 | 65  | 0,0425 | 123 | 0,05 |
| k_Bacteria;p_Proteobacteria;c_Alphaproteobacteria;o_Rhodobacterales;Other;Other                               | 0,0472 | 13 | 0,0088 | 5   | 0,0558 | 39 | 0,0671 | 14 | 0,0690 | 17 | 0,0040 | 2   | 0,0420 | 90  | 0,03 |
| k_Bacteria;p_Firmicutes;c_Bacilli;o_Bacillales;f_Planococaceae;Other                                          | 0,0363 | 10 | 0,0370 | 21  | 0,0272 | 19 | 0,1103 | 23 | 0,0243 | 6  | 0,0060 | 3   | 0,0402 | 82  | 0,04 |
| k_Bacteria;p_Proteobacteria;c_Alphaproteobacteria;o_Caulobacterales;f_Caulobacteraceae;g__                    | 0,0218 | 6  | 0,0071 | 4   | 0,0157 | 11 | 0,0575 | 12 | 0,1136 | 28 | 0,0201 | 10  | 0,0393 | 71  | 0,04 |
| k_Bacteria;p_Proteobacteria;c_Deltaproteobacteria;o_Sva0853;f_g__                                             | 0,0182 | 5  | 0,0247 | 14  | 0,0071 | 5  | 0,0479 | 10 | 0,1014 | 25 | 0,0361 | 18  | 0,0392 | 77  | 0,03 |
| k_Bacteria;p_Verrucomicrobia;c_Verrucomicrobiae;o_Verrucomicrobiales;f_Verrucomicrobiaceae;g_MSBL3            | 0,1054 | 29 | 0,0423 | 24  | 0,0486 | 34 | 0,0000 | 0  | 0,0000 | 0  | 0,0381 | 19  | 0,0391 | 106 | 0,04 |
| k_Bacteria;p_Chlorobi;c_OPB56;o_f_g__                                                                         | 0,0691 | 19 | 0,0987 | 56  | 0,0515 | 36 | 0,0000 | 0  | 0,0000 | 0  | 0,0120 | 6   | 0,0385 | 117 | 0,04 |
| k_Bacteria;p_Bacteroidetes;c_Flavobacteria;o_Flavobacteriales;f_Cryomorphaceae;g_Owenweeksia                  | 0,0400 | 11 | 0,0353 | 20  | 0,0872 | 61 | 0,0000 | 0  | 0,0406 | 10 | 0,0261 | 13  | 0,0382 | 115 | 0,03 |
| k_Bacteria;p_Acidobacteria;c_[Chloracidobacteria];o_RB41;f_Ellin6075;g__                                      | 0,0327 | 9  | 0,0247 | 14  | 0,0815 | 57 | 0,0000 | 0  | 0,0284 | 7  | 0,0582 | 29  | 0,0376 | 116 | 0,03 |
| k_Bacteria;p_Proteobacteria;c_Gammaproteobacteria;o_Oceanospirillales;f_Halomonadaceae;g_Candidatus Portiera  | 0,0472 | 13 | 0,0476 | 27  | 0,0658 | 46 | 0,0000 | 0  | 0,0284 | 7  | 0,0361 | 18  | 0,0375 | 111 | 0,02 |
| k_Bacteria;p_Verrucomicrobia;c_Verrucomicrobiae;o_Verrucomicrobiales;f_Verrucomicrobiaceae;g_Haloferula       | 0,0727 | 20 | 0,0300 | 17  | 0,0486 | 34 | 0,0527 | 11 | 0,0162 | 4  | 0,0000 | 0   | 0,0367 | 86  | 0,03 |
| k_Bacteria;p_Proteobacteria;c_Gammaproteobacteria;o_Alteromonadales;f_Alteromonadaceae;g__                    | 0,0654 | 18 | 0,0071 | 4   | 0,0372 | 26 | 0,0000 | 0  | 0,0000 | 0  | 0,1063 | 53  | 0,0360 | 101 | 0,04 |
| k_Bacteria;p_Proteobacteria;c_Gammaproteobacteria;o_Chromatiales;f_Chromatiaceae;Other                        | 0,0000 | 0  | 0,0000 | 0   | 0,0000 | 0  | 0,2158 | 45 | 0,0000 | 0  | 0,0000 | 0   | 0,0360 | 45  | 0,09 |
| k_Bacteria;p_Proteobacteria;c_Gammaproteobacteria;o_Alteromonadales;f_Alteromonadaceae;g_Marinobacter         | 0,0327 | 9  | 0,0476 | 27  | 0,0143 | 10 | 0,1103 | 23 | 0,0000 | 0  | 0,0100 | 5   | 0,0358 | 74  | 0,04 |
| k_Bacteria;p_Proteobacteria;c_Alphaproteobacteria;o_Rhizobiales;f_Phyllobacteriaceae;Other                    | 0,0291 | 8  | 0,0353 | 20  | 0,0114 | 8  | 0,0432 | 9  | 0,0608 | 15 | 0,0301 | 15  | 0,0350 | 75  | 0,02 |
| k_Bacteria;p_Proteobacteria;c_Deltaproteobacteria;o_Spirobacillales;f_g__                                     | 0,0872 | 24 | 0,0141 | 8   | 0,0143 | 10 | 0,0192 | 4  | 0,0690 | 17 | 0,0060 | 3   | 0,0350 | 66  | 0,03 |
| k_Bacteria;p_Proteobacteria;c_Alphaproteobacteria;o_Rickettsiales;f_g__                                       | 0,0618 | 17 | 0,0282 | 16  | 0,0272 | 19 | 0,0432 | 9  | 0,0243 | 6  | 0,0221 | 11  | 0,0345 | 78  | 0,02 |
| k_Bacteria;p_Proteobacteria;c_Deltaproteobacteria;o_Myxococcales;f_0319-6G20;g__                              | 0,0036 | 1  | 0,0353 | 20  | 0,0129 | 9  | 0,0000 | 0  | 0,1541 | 38 | 0,0000 | 0   | 0,0343 | 68  | 0,06 |
| k_Bacteria;p_Chloroflexi;c_Anaerolineae;o_OPB11;f_g__                                                         | 0,0291 | 8  | 0,0071 | 4   | 0,0315 | 22 | 0,0288 | 6  | 0,0952 | 27 | 0,0000 | 0   | 0,0343 | 67  | 0,04 |
| k_Bacteria;p_Proteobacteria;c_Gammaproteobacteria;o_Legionellales;f_g__                                       | 0,1127 | 31 | 0,0176 | 10  | 0,0014 | 1  | 0,0000 | 0  | 0,0527 | 13 | 0,0040 | 2   | 0,0314 | 57  | 0,04 |
| k_Bacteria;p_Proteobacteria;c_TA18;o_CV90;f_g__                                                               | 0,0000 | 0  | 0,0159 | 9   | 0,0000 | 0  | 0,1534 | 32 | 0,0000 | 0  | 0,0180 | 9   | 0,0312 | 50  | 0,06 |
| k_Bacteria;p_Proteobacteria;c_Deltaproteobacteria;o_PB19;f_g__                                                | 0,0182 | 5  | 0,0053 | 3   | 0,0300 | 21 | 0,0863 | 18 | 0,0446 | 11 | 0,0020 | 1   | 0,0311 | 59  | 0,03 |
| k_Bacteria;p_Proteobacteria;c_Gammaproteobacteria;o_Pseudomonadales;f_Pseudomonadaceae;Other                  | 0,0618 | 17 | 0,0141 | 8   | 0,0114 | 8  | 0,0671 | 14 | 0,0284 | 7  | 0,0020 | 1   | 0,0308 | 55  | 0,03 |
| k_Bacteria;p_Chloroflexi;c_Anaerolineae;o_DRC31;f_g__                                                         | 0,0218 | 6  | 0,0846 | 48  | 0,0000 | 0  | 0,0000 | 0  | 0,0000 | 0  | 0,0782 | 39  | 0,0308 | 93  | 0,04 |
| k_Bacteria;p_Bacteroidetes;c_BME43;o_f_g__                                                                    | 0,0254 | 7  | 0,0176 | 10  | 0,0000 | 0  | 0,0048 | 1  | 0,0000 | 0  | 0,1364 | 68  | 0,0307 | 86  | 0,05 |
| k_Bacteria;p_Bacteroidetes;c_Flavobacteria;o_Flavobacteriales;f_Flavobacteriaceae;g_Arenibacter               | 0,0109 | 3  | 0,0635 | 36  | 0,0329 | 23 | 0,0479 | 10 | 0,0000 | 0  | 0,0241 | 12  | 0,0299 | 84  | 0,02 |
| k_Bacteria;p_Bacteroidetes;c_Flavobacteria;o_Flavobacteriales;f_[Weeksellaceae];Other                         | 0,0073 | 2  | 0,0035 | 2   | 0,0000 | 0  | 0,0144 | 3  | 0,1460 | 36 | 0,0040 | 2   | 0,0292 | 45  | 0,06 |
| k_Bacteria;p_Gemmatimonadetes;c_Gemm-2;o_f_g__                                                                | 0,0545 | 15 | 0,0476 | 27  | 0,0458 | 32 | 0,0144 | 3  | 0,0122 | 3  | 0,0000 | 0   | 0,0291 | 80  | 0,02 |
| k_Bacteria;p_Verrucomicrobia;c_[Spartobacteria];o_[Chthoniobacteriales];f_[Chthoniobacteraceae];g_DA101       | 0,0363 | 10 | 0,0423 | 24  | 0,0243 | 17 | 0,0000 | 0  | 0,0690 | 17 | 0,0020 | 1   | 0,0290 | 69  | 0,03 |
| k_Bacteria;p_Plantomycetes;c_OM190;o_agg27;f_g__                                                              | 0,0327 | 9  | 0,0441 | 25  | 0,0272 | 19 | 0,0000 | 0  | 0,0000 | 0  | 0,0682 | 34  | 0,0287 | 87  | 0,03 |
| k_Bacteria;p_Proteobacteria;c_Deltaproteobacteria;o_Myxococcales;f_Haliangiaceae;g__                          | 0,0509 | 14 | 0,0141 | 8   | 0,0500 | 35 | 0,0000 | 0  | 0,0000 | 0  | 0,0521 | 26  | 0,0279 | 83  | 0,03 |
| k_Bacteria;p_Actinobacteria;c_Acidimicrobia;o_Acidimicrobiales;f_SC3-41;g__                                   | 0,0000 | 0  | 0,0441 | 25  | 0,0200 | 14 | 0,0575 | 12 | 0,0000 | 0  | 0,0441 | 22  | 0,0276 | 73  | 0,02 |

|                                                                                                                |        |    |        |    |        |    |        |    |        |    |        |    |        |    |      |
|----------------------------------------------------------------------------------------------------------------|--------|----|--------|----|--------|----|--------|----|--------|----|--------|----|--------|----|------|
| k_Bacteria;p_Firmicutes;c_Clostridia;o_Clostridiales;f_[Tissierellaceae];g_Finegoldia                          | 0,0254 | 7  | 0,0088 | 5  | 0,0186 | 13 | 0,0623 | 13 | 0,0406 | 10 | 0,0060 | 3  | 0,0270 | 51 | 0,02 |
| k_Bacteria;p_Verrucomicrobia;c_Verruco-5;o_R76-B128;f_g                                                        | 0,0182 | 5  | 0,1375 | 78 | 0,0057 | 4  | 0,0000 | 0  | 0,0000 | 0  | 0,0000 | 0  | 0,0269 | 87 | 0,05 |
| k_Bacteria;p_Proteobacteria;c_Alphaproteobacteria;o_Rhodospirillales;f_Rhodospirillaceae;g_Rhodovibrio         | 0,0036 | 1  | 0,0071 | 4  | 0,0157 | 11 | 0,1007 | 21 | 0,0324 | 8  | 0,0000 | 0  | 0,0266 | 45 | 0,04 |
| k_Bacteria;p_Proteobacteria;c_Deltaproteobacteria;o_Bdellovibrionales;f_Bdellovibrionaceae;g_Bdellovibrio      | 0,0327 | 9  | 0,0159 | 9  | 0,0458 | 32 | 0,0288 | 6  | 0,0162 | 4  | 0,0201 | 10 | 0,0266 | 70 | 0,01 |
| k_Bacteria;p_Bacteroidetes;c_Flavobacteriia;o_Flavobacteriales;f_Cryomorphaceae;g_Cryomorpha                   | 0,0254 | 7  | 0,0071 | 4  | 0,0214 | 15 | 0,0479 | 10 | 0,0446 | 11 | 0,0120 | 6  | 0,0264 | 53 | 0,02 |
| k_Bacteria;p_Proteobacteria;c_Gammaproteobacteria;o_Alteromonadales;f_HTCC2188;g                               | 0,0327 | 9  | 0,0106 | 6  | 0,0958 | 67 | 0,0144 | 3  | 0,0000 | 0  | 0,0000 | 0  | 0,0256 | 85 | 0,04 |
| k_Bacteria;p_Firmicutes;c_Bacilli;o_Bacillales;f_Exiguobacteraceae;g_Exiguobacterium                           | 0,0000 | 0  | 0,0106 | 6  | 0,0172 | 12 | 0,0671 | 14 | 0,0568 | 14 | 0,0000 | 0  | 0,0253 | 46 | 0,03 |
| k_Bacteria;p_Proteobacteria;c_Gammaproteobacteria;o_Legionellales;f_Coxiellaceae;Other                         | 0,0000 | 0  | 0,0529 | 30 | 0,0658 | 46 | 0,0000 | 0  | 0,0284 | 7  | 0,0040 | 2  | 0,0252 | 85 | 0,03 |
| k_Bacteria;p_Lentisphaerae;c_[Lentisphaeria];o_Lentisphaerales;f_Lentisphaeraceae;g                            | 0,0036 | 1  | 0,0035 | 2  | 0,0157 | 11 | 0,0000 | 0  | 0,1257 | 31 | 0,0000 | 0  | 0,0248 | 45 | 0,05 |
| k_Bacteria;p_Bacteroidetes;c_Flavobacteriia;o_Flavobacteriales;f_Flavobacteriaceae;g_Gillisia                  | 0,0582 | 16 | 0,0018 | 1  | 0,0214 | 15 | 0,0144 | 3  | 0,0365 | 9  | 0,0160 | 8  | 0,0247 | 52 | 0,02 |
| k_Bacteria;p_Proteobacteria;c_Gammaproteobacteria;o_Pseudomonadales;f_Pseudomonadaceae;g                       | 0,0327 | 9  | 0,0141 | 8  | 0,0472 | 33 | 0,0144 | 3  | 0,0284 | 7  | 0,0080 | 4  | 0,0241 | 64 | 0,01 |
| k_Bacteria;p_Proteobacteria;c_Deltaproteobacteria;o_Sva0853;f_JTB36;g                                          | 0,0763 | 21 | 0,0018 | 1  | 0,0429 | 30 | 0,0144 | 3  | 0,0000 | 0  | 0,0080 | 4  | 0,0239 | 59 | 0,03 |
| k_Bacteria;p_Proteobacteria;c_Deltaproteobacteria;o_Bdellovibrionales;f_Bacteriovoracaceae;g                   | 0,0400 | 11 | 0,0000 | 0  | 0,0586 | 41 | 0,0336 | 7  | 0,0000 | 0  | 0,0100 | 5  | 0,0237 | 64 | 0,02 |
| k_Bacteria;p_Proteobacteria;c_Gammaproteobacteria;o_Thiotrichales;Other;Other                                  | 0,0109 | 3  | 0,0423 | 24 | 0,0086 | 6  | 0,0000 | 0  | 0,0000 | 0  | 0,0802 | 40 | 0,0237 | 73 | 0,03 |
| k_Bacteria;p_Proteobacteria;c_Gammaproteobacteria;o_Alteromonadales;f_[Chromatiaceae];g_Rheinheimera           | 0,0472 | 13 | 0,0106 | 6  | 0,0257 | 18 | 0,0000 | 0  | 0,0000 | 0  | 0,0562 | 28 | 0,0233 | 65 | 0,02 |
| k_Bacteria;p_Chloroflexi;c_Anaerolineae;o_Caldilineales;f_Caldilineaceae;g                                     | 0,0000 | 0  | 0,0335 | 19 | 0,0014 | 1  | 0,0671 | 14 | 0,0000 | 0  | 0,0361 | 18 | 0,0230 | 52 | 0,03 |
| k_Bacteria;p_Firmicutes;c_Clostridia;o_Clostridiales;f_Veillonellaceae;g_Veillonella                           | 0,0436 | 12 | 0,0212 | 12 | 0,0343 | 24 | 0,0288 | 6  | 0,0000 | 0  | 0,0100 | 5  | 0,0230 | 59 | 0,02 |
| k_Bacteria;p_Firmicutes;c_Clostridia;o_Clostridiales;f_[Tissierellaceae];g_Peptoniphilus                       | 0,0509 | 14 | 0,0088 | 5  | 0,0129 | 9  | 0,0479 | 10 | 0,0000 | 0  | 0,0140 | 7  | 0,0224 | 45 | 0,02 |
| k_Bacteria;p_Proteobacteria;c_Alphaproteobacteria;o_Rhizobiales;f_Bradyrhizobiaceae;g_Bosea                    | 0,0000 | 0  | 0,0053 | 3  | 0,0257 | 18 | 0,0671 | 14 | 0,0203 | 5  | 0,0160 | 8  | 0,0224 | 48 | 0,02 |
| k_Bacteria;p_Firmicutes;c_Clostridia;o_Clostridiales;f_Ruminococcaceae;g                                       | 0,0436 | 12 | 0,0035 | 2  | 0,0243 | 17 | 0,0384 | 8  | 0,0000 | 0  | 0,0221 | 11 | 0,0220 | 50 | 0,02 |
| k_Bacteria;p_Proteobacteria;c_Gammaproteobacteria;o_Xanthomonadales;f_Xanthomonadaceae;g_Stenotrophomonas      | 0,0036 | 1  | 0,0000 | 0  | 0,0000 | 0  | 0,0000 | 0  | 0,1257 | 31 | 0,0000 | 0  | 0,0216 | 32 | 0,05 |
| k_Bacteria;p_Proteobacteria;c_Gammaproteobacteria;o_Pasteurellales;f_Pasteurellaceae;g_Chelonobacter           | 0,0872 | 24 | 0,0000 | 0  | 0,0315 | 22 | 0,0000 | 0  | 0,0000 | 0  | 0,0100 | 5  | 0,0215 | 51 | 0,03 |
| k_Bacteria;p_Proteobacteria;c_Alphaproteobacteria;o_Rhodobacterales;f_Rhodobacteraceae;g_Paracoccus            | 0,0254 | 7  | 0,0106 | 6  | 0,0200 | 14 | 0,0240 | 5  | 0,0487 | 12 | 0,0000 | 0  | 0,0214 | 44 | 0,02 |
| k_Bacteria;p_Proteobacteria;c_Gammaproteobacteria;o_Alteromonadales;f_OM60;g_Congregibacter                    | 0,0000 | 0  | 0,0123 | 7  | 0,0186 | 13 | 0,0863 | 18 | 0,0081 | 2  | 0,0020 | 1  | 0,0212 | 41 | 0,03 |
| k_Bacteria;p_Proteobacteria;c_Gammaproteobacteria;o_Legionellales;f_Francisellaceae;g_Fangia                   | 0,0545 | 15 | 0,0564 | 32 | 0,0000 | 0  | 0,0096 | 2  | 0,0000 | 0  | 0,0060 | 3  | 0,0211 | 52 | 0,03 |
| k_Bacteria;p_Verrucomicrobia;c_Opitutae;o_Opitutales;f_Opitutaceae;g_Opitutus                                  | 0,0109 | 3  | 0,0423 | 24 | 0,0057 | 4  | 0,0000 | 0  | 0,0568 | 14 | 0,0080 | 4  | 0,0206 | 49 | 0,02 |
| k_Bacteria;p_Proteobacteria;c_Gammaproteobacteria;o_Alteromonadales;f_Alteromonadaceae;g_Candidatus Endobugula | 0,0145 | 4  | 0,0000 | 0  | 0,0400 | 28 | 0,0432 | 9  | 0,0203 | 5  | 0,0000 | 0  | 0,0197 | 46 | 0,02 |
| k_Bacteria;p_Bacteroidetes;c_[Saprosiriales];o_[Saprosiriales];f_Saprosiraceae;g_Saprosira                     | 0,0472 | 13 | 0,0229 | 13 | 0,0129 | 9  | 0,0000 | 0  | 0,0041 | 1  | 0,0301 | 15 | 0,0195 | 51 | 0,02 |
| k_Bacteria;Other;Other;Other;Other;Other                                                                       | 0,0145 | 4  | 0,0317 | 18 | 0,0157 | 11 | 0,0144 | 3  | 0,0365 | 9  | 0,0040 | 2  | 0,0195 | 47 | 0,01 |
| k_Bacteria;p_Proteobacteria;c_Gammaproteobacteria;o_Xanthomonadales;f_Xanthomonadaceae;g                       | 0,1018 | 28 | 0,0141 | 8  | 0,0000 | 0  | 0,0000 | 0  | 0,0000 | 0  | 0,0000 | 0  | 0,0193 | 36 | 0,04 |
| k_Bacteria;p_Bacteroidetes;c_Cytophagia;o_Cytophagales;f_Cytophagaceae;g_Microscilla                           | 0,0509 | 14 | 0,0018 | 1  | 0,0243 | 17 | 0,0384 | 8  | 0,0000 | 0  | 0,0000 | 0  | 0,0192 | 40 | 0,02 |
| k_Bacteria;p_Verrucomicrobia;c_Verruco-5;o_S51-B-03-39;f_g                                                     | 0,0036 | 1  | 0,0494 | 28 | 0,0186 | 13 | 0,0000 | 0  | 0,0162 | 4  | 0,0261 | 13 | 0,0190 | 59 | 0,02 |
| k_Bacteria;p_Firmicutes;c_Bacilli;o_Bacillales;f_Paenibacillaceae;g_Paenibacillus                              | 0,1127 | 31 | 0,0000 | 0  | 0,0000 | 0  | 0,0000 | 0  | 0,0000 | 0  | 0,0000 | 0  | 0,0188 | 31 | 0,05 |
| k_Bacteria;p_Proteobacteria;c_Alphaproteobacteria;o_Sphingomonadales;f_Erythrobacteraceae;g_Lutibacterium      | 0,0291 | 8  | 0,0000 | 0  | 0,0086 | 6  | 0,0527 | 11 | 0,0000 | 0  | 0,0221 | 11 | 0,0187 | 36 | 0,02 |
| k_Bacteria;p_Proteobacteria;c_Gammaproteobacteria;o_Enterobacteriales;f_Enterobacteriaceae;g_Providencia       | 0,0036 | 1  | 0,0194 | 11 | 0,0100 | 7  | 0,0000 | 0  | 0,0000 | 0  | 0,0782 | 39 | 0,0185 | 58 | 0,03 |
| k_Bacteria;p_Bacteroidetes;c_[Rhodothermii];o_[Rhodothermales];f_[Balneolaceae];g_Balneola                     | 0,0254 | 7  | 0,0088 | 5  | 0,0200 | 14 | 0,0000 | 0  | 0,0568 | 14 | 0,0000 | 0  | 0,0185 | 40 | 0,02 |
| k_Bacteria;p_Proteobacteria;c_Alphaproteobacteria;o_Rhodospirillales;f_Rhodospirillaceae;g_Novispirillum       | 0,0000 | 0  | 0,0000 | 0  | 0,0200 | 14 | 0,0623 | 13 | 0,0284 | 7  | 0,0000 | 0  | 0,0185 | 34 | 0,02 |
| k_Bacteria;p_Cyanobacteria;c_Nostocophycidae;o_Stigonematales;f_Rivulariaceae;Other                            | 0,0000 | 0  | 0,0000 | 0  | 0,0286 | 20 | 0,0096 | 2  | 0,0406 | 10 | 0,0301 | 15 | 0,0181 | 47 | 0,02 |
| k_Bacteria;p_Proteobacteria;c_Alphaproteobacteria;o_Rhizobiales;f_Bradyrhizobiaceae;g                          | 0,0000 | 0  | 0,0035 | 2  | 0,0014 | 1  | 0,0240 | 5  | 0,0771 | 19 | 0,0000 | 0  | 0,0177 | 27 | 0,03 |
| k_Bacteria;p_Proteobacteria;c_Alphaproteobacteria;o_Rhodobacterales;f_Rhodobacteraceae;g_Roseobacter           | 0,0000 | 0  | 0,0000 | 0  | 0,0443 | 31 | 0,0479 | 10 | 0,0000 | 0  | 0,0120 | 6  | 0,0174 | 47 | 0,02 |
| k_Bacteria;p_Proteobacteria;c_Alphaproteobacteria;o_Rhodobacterales;f_Hyphomonadaceae;g_Hyphomonas             | 0,0254 | 7  | 0,0229 | 13 | 0,0229 | 16 | 0,0000 | 0  | 0,0122 | 3  | 0,0201 | 10 | 0,0172 | 49 | 0,01 |
| k_Bacteria;p_Bacteroidetes;c_Flavobacteriia;o_Flavobacteriales;f_[Weeksellaceae];g_Cloacibacterium             | 0,0145 | 4  | 0,0740 | 42 | 0,0014 | 1  | 0,0000 | 0  | 0,0122 | 3  | 0,0000 | 0  | 0,0170 | 50 | 0,03 |
| k_Bacteria;p_Bacteroidetes;c_Bacteroidia;o_Bacteroidales;f_Prevotellaceae;g_Prevotella                         | 0,0000 | 0  | 0,0212 | 12 | 0,0057 | 4  | 0,0096 | 2  | 0,0487 | 12 | 0,0160 | 8  | 0,0169 | 38 | 0,02 |
| k_Bacteria;p_Cyanobacteria;c_Oscillatoriophyceae;o_Chroococcales;f_Spirulinaceae;g_Spirulina                   | 0,0291 | 8  | 0,0000 | 0  | 0,0200 | 14 | 0,0479 | 10 | 0,0000 | 0  | 0,0040 | 2  | 0,0168 | 34 | 0,02 |
| k_Bacteria;p_Proteobacteria;c_Gammaproteobacteria;o_Oceanospirillales;f_Halomonadaceae;g_Cobetia               | 0,0472 | 13 | 0,0123 | 7  | 0,0000 | 0  | 0,0000 | 0  | 0,0406 | 10 | 0,0000 | 0  | 0,0167 | 30 | 0,02 |
| k_Bacteria;p_Firmicutes;c_Clostridia;o_Clostridiales;f_Lachnospiraceae;Other                                   | 0,0145 | 4  | 0,0159 | 9  | 0,0315 | 22 | 0,0000 | 0  | 0,0000 | 0  | 0,0381 | 19 | 0,0167 | 54 | 0,02 |
| k_Bacteria;p_Proteobacteria;c_Alphaproteobacteria;o_Rhizobiales;f_Cohaesibacteraceae;g                         | 0,0291 | 8  | 0,0652 | 37 | 0,0000 | 0  | 0,0000 | 0  | 0,0000 | 0  | 0,0040 | 2  | 0,0164 | 47 | 0,03 |
| k_Bacteria;p_Bacteroidetes;c_[Rhodothermii];o_[Rhodothermales];f_Rhodothermaceae;g                             | 0,0000 | 0  | 0,0494 | 28 | 0,0000 | 0  | 0,0000 | 0  | 0,0000 | 0  | 0,0481 | 24 | 0,0162 | 52 | 0,03 |
| k_Bacteria;p_NKB19;c_TSBW08;o_f_g                                                                              | 0,0000 | 0  | 0,0000 | 0  | 0,0000 | 0  | 0,0527 | 11 | 0,0446 | 11 | 0,0000 | 0  | 0,0162 | 22 | 0,03 |
| k_Bacteria;p_Proteobacteria;c_Deltaproteobacteria;o_Desulfuromonadales;f_Desulfuromonadaceae;g                 | 0,0182 | 5  | 0,0370 | 21 | 0,0014 | 1  | 0,0096 | 2  | 0,0203 | 5  | 0,0060 | 3  | 0,0154 | 37 | 0,01 |
| k_Bacteria;p_Acidobacteria;c_OS-K;o_f_g                                                                        | 0,0182 | 5  | 0,0123 | 7  | 0,0143 | 10 | 0,0000 | 0  | 0,0203 | 5  | 0,0261 | 13 | 0,0152 | 40 | 0,01 |
| k_Bacteria;p_Proteobacteria;c_Gammaproteobacteria;o_Alteromonadales;f_Alteromonadaceae;g_Marinimicrobium       | 0,0582 | 16 | 0,0141 | 8  | 0,0186 | 13 | 0,0000 | 0  | 0,0000 | 0  | 0,0000 | 0  | 0,0151 | 37 | 0,02 |
| k_Bacteria;p_Proteobacteria;c_Gammaproteobacteria;o_Enterobacteriales;f_Enterobacteriaceae;g_Photorhabdus      | 0,0000 | 0  | 0,0000 | 0  | 0,0143 | 10 | 0,0336 | 7  | 0,0406 | 10 | 0,0000 | 0  | 0,0147 | 27 | 0,02 |
| k_Bacteria;p_Fusobacteria;c_Fusobacteriia;o_Fusobacteriales;f_Fusobacteriaceae;g_Fusobacterium                 | 0,0000 | 0  | 0,0000 | 0  | 0,0114 | 8  | 0,0767 | 16 | 0,0000 | 0  | 0,0000 | 0  | 0,0147 | 24 | 0,03 |
| k_Bacteria;p_Spirochaetes;c_Spirochaetes;o_Spirochaetales;f_Spirochaetaeaceae;g                                | 0,0254 | 7  | 0,0000 | 0  | 0,0143 | 10 | 0,0240 | 5  | 0,0243 | 6  | 0,0000 | 0  | 0,0147 | 28 | 0,01 |
| k_Bacteria;p_Proteobacteria;c_Betaproteobacteria;o_Methylophilales;f_Methylophilaceae;g_Methylotenera          | 0,0182 | 5  | 0,0000 | 0  | 0,0000 | 0  | 0,0000 | 0  | 0,0000 | 0  | 0,0662 | 33 | 0,0141 | 38 | 0,03 |
| k_Bacteria;p_Proteobacteria;c_Alphaproteobacteria;o_Rhodospirillales;f_Rhodospirillaceae;g_Nisaea              | 0,0000 | 0  | 0,0723 | 41 | 0,0114 | 8  | 0,0000 | 0  | 0,0000 | 0  | 0,0000 | 0  | 0,0140 | 49 | 0,03 |
| k_Bacteria;p_Verrucomicrobia;c_Verrucomicrobiae;o_Verrucomicrobiales;f_Verrucomicrobiaceae;g_Luteolibacter     | 0,0036 | 1  | 0,0000 | 0  | 0,0086 | 6  | 0,0144 | 3  | 0,0568 | 14 | 0,0000 | 0  | 0,0139 | 24 | 0,02 |
| k_Bacteria;p_Proteobacteria;c_Zetaproteobacteria;o_Mariprofundales;f_Mariprofundaceae;g_Mariprofundus          | 0,0182 | 5  | 0,0000 | 0  | 0,0529 | 37 | 0,0096 | 2  | 0,0000 | 0  | 0,0000 | 0  | 0,0134 | 44 | 0,02 |
| k_Bacteria;p_Proteobacteria;c_Deltaproteobacteria;o_Desulfobacterales;f_Desulfobulbaceae;g_Desulfocapsa        | 0,0000 | 0  | 0,0000 | 0  | 0,0458 | 32 | 0,0288 | 6  | 0,0000 | 0  | 0,0060 | 3  | 0,0134 | 41 | 0,02 |
| k_Bacteria;p_Bacteroidetes;c_[Rhodothermii];o_[Rhodothermales];f_Rhodothermaceae;g_Rubricoccus                 | 0,0109 | 3  | 0,0000 | 0  | 0,0400 | 28 | 0,0096 | 2  | 0,0000 | 0  | 0,0180 | 9  | 0,0131 | 42 | 0,01 |
| k_Bacteria;p_Verrucomicrobia;c_[Spartobacteria];o_[Chthoniobacterales];f_O1D2236;g                             | 0,0000 | 0  | 0,0000 | 0  | 0,0000 | 0  | 0,0096 | 2  | 0,0690 | 17 | 0,0000 | 0  | 0,0131 | 19 | 0,03 |
| k_Bacteria;p_Actinobacteria;c_Acidimicrobia;o_Acidimicrobiales;f_Microthrixaceae;g                             | 0,0145 | 4  | 0,0264 | 15 | 0,0000 | 0  | 0,0000 | 0  | 0,0365 | 9  | 0,0000 | 0  | 0,0129 | 28 | 0,02 |
| k_Bacteria;p_Bacteroidetes;c_Bacteroidia;o_Bacteroidales;f_Bacteroidaceae;g_Bacteroides                        | 0,0145 | 4  | 0,0000 | 0  | 0,0086 | 6  | 0,0096 | 2  | 0,0000 | 0  | 0,0441 | 22 | 0,0128 | 34 | 0,02 |
| k_Bacteria;p_Proteobacteria;c_Deltaproteobacteria;o_Myxococcales;Other;Other                                   | 0,0327 | 9  | 0,0123 | 7  | 0,0071 | 5  | 0,0000 | 0  | 0,0243 | 6  | 0,0000 | 0  | 0,0128 | 27 | 0,01 |
| k_Bacteria;p_Proteobacteria;c_Alphaproteobacteria;o_Sphingomonadales;f_Sphingomonadaceae;g_Sphingomonas        | 0,0000 | 0  | 0,0018 | 1  | 0,0057 | 4  | 0,0000 | 0  | 0,0203 | 5  | 0,0481 | 24 | 0,0126 | 34 | 0,02 |
| k_Bacteria;p_Proteobacteria;c_Gammaproteobacteria;o_Xanthomonadales;f_Sinobacteraceae;g                        | 0,0073 | 2  | 0,0035 | 2  | 0,0129 | 9  | 0,0096 | 2  | 0,0000 | 0  | 0,0421 | 21 | 0,0126 | 36 | 0,02 |
| k_Bacteria;p_Proteobacteria;c_Alphaproteobacteria;o_Rhodobacterales;f_Rhodobacteraceae;g_Phaeobacter           | 0,0036 | 1  | 0,0212 | 12 | 0,0172 | 12 | 0,0192 | 4  | 0,0041 | 1  | 0,0100 | 5  | 0,0125 | 35 | 0,01 |
| k_Bacteria;p_Proteobacteria;c_Gammaproteobacteria;o_Thiotrichales;f_Thiotrichaceae;Other                       | 0,0000 | 0  | 0,0282 | 16 | 0,0086 | 6  | 0,0000 | 0  | 0,0000 | 0  | 0,0381 | 19 | 0,0125 | 41 | 0,02 |

|                                                                                                              |        |    |        |    |        |    |        |    |        |    |        |    |        |    |      |
|--------------------------------------------------------------------------------------------------------------|--------|----|--------|----|--------|----|--------|----|--------|----|--------|----|--------|----|------|
| k_Bacteria;p_Cyanobacteria;c_Synechococcophycideae;o_Synechococcales;f_Synechococaceae;g_Synechococcus       | 0,0036 | 1  | 0,0035 | 2  | 0,0014 | 1  | 0,0096 | 2  | 0,0324 | 8  | 0,0241 | 12 | 0,0124 | 26 | 0,01 |
| k_Bacteria;p_Proteobacteria;c_Gammaproteobacteria;o_Legionellales;f_Francisellaceae;g_Francisella            | 0,0218 | 6  | 0,0106 | 6  | 0,0029 | 2  | 0,0000 | 0  | 0,0365 | 9  | 0,0020 | 1  | 0,0123 | 24 | 0,01 |
| k_Bacteria;p_Verrucomicrobia;Other;Other;Other;Other                                                         | 0,0109 | 3  | 0,0335 | 19 | 0,0229 | 16 | 0,0048 | 1  | 0,0000 | 0  | 0,0000 | 0  | 0,0120 | 39 | 0,01 |
| k_Bacteria;p_Proteobacteria;c_Deltaproteobacteria;o_Desulfobacterales;f_Desulfobacteraceae;g__               | 0,0000 | 0  | 0,0617 | 35 | 0,0100 | 7  | 0,0000 | 0  | 0,0000 | 0  | 0,0000 | 0  | 0,0120 | 42 | 0,02 |
| k_Bacteria;p_Bacteroidetes;c_Cytophagia;o_Cytophagales;f_Amoebophilaceae;g_SC3-56                            | 0,0145 | 4  | 0,0212 | 12 | 0,0143 | 10 | 0,0000 | 0  | 0,0000 | 0  | 0,0201 | 10 | 0,0117 | 36 | 0,01 |
| k_Bacteria;p_Proteobacteria;c_Betaproteobacteria;o_Rhodocyclales;f_Rhodocyclaceae;g_Propionivibrio           | 0,0000 | 0  | 0,0000 | 0  | 0,0043 | 3  | 0,0432 | 9  | 0,0000 | 0  | 0,0221 | 11 | 0,0116 | 23 | 0,02 |
| k_Bacteria;p_Firmicutes;c_Bacilli;o_Lactobacillales;Other;Other                                              | 0,0036 | 1  | 0,0088 | 5  | 0,0000 | 0  | 0,0000 | 0  | 0,0568 | 14 | 0,0000 | 0  | 0,0115 | 20 | 0,02 |
| k_Bacteria;p_Chloroflexi;c_Anaerolineae;Other;Other;Other                                                    | 0,0000 | 0  | 0,0000 | 0  | 0,0458 | 32 | 0,0192 | 4  | 0,0000 | 0  | 0,0040 | 2  | 0,0115 | 38 | 0,02 |
| k_Bacteria;p_Bacteroidetes;c_Cytophagia;o_Cytophagales;f_Flammeovirgaceae;g_Flexithrix                       | 0,0218 | 6  | 0,0141 | 8  | 0,0229 | 16 | 0,0096 | 2  | 0,0000 | 0  | 0,0000 | 0  | 0,0114 | 32 | 0,01 |
| k_Bacteria;p_Proteobacteria;c_Gammaproteobacteria;o_Vibrionales;Other;Other                                  | 0,0036 | 1  | 0,0053 | 3  | 0,0129 | 9  | 0,0000 | 0  | 0,0324 | 8  | 0,0140 | 7  | 0,0114 | 28 | 0,01 |
| k_Bacteria;p_Bacteroidetes;c_Cytophagia;o_Cytophagales;f_Flammeovirgaceae;g_JTB248                           | 0,0254 | 7  | 0,0000 | 0  | 0,0272 | 19 | 0,0000 | 0  | 0,0000 | 0  | 0,0140 | 7  | 0,0111 | 33 | 0,01 |
| k_Bacteria;p_NKB19;c_o_f_g__                                                                                 | 0,0036 | 1  | 0,0194 | 11 | 0,0000 | 0  | 0,0432 | 9  | 0,0000 | 0  | 0,0000 | 0  | 0,0110 | 21 | 0,02 |
| k_Bacteria;p_WS3;c_PRR-12;o_GN03;f_KSB4;g__                                                                  | 0,0145 | 4  | 0,0123 | 7  | 0,0100 | 7  | 0,0288 | 6  | 0,0000 | 0  | 0,0000 | 0  | 0,0109 | 24 | 0,01 |
| k_Bacteria;p_Proteobacteria;c_TA18;o_PHOS-HD29;f_g__                                                         | 0,0327 | 9  | 0,0176 | 10 | 0,0043 | 3  | 0,0000 | 0  | 0,0000 | 0  | 0,0100 | 5  | 0,0108 | 27 | 0,01 |
| k_Bacteria;p_Plantomycetes;c_Plantomycetia;Other;Other;Other                                                 | 0,0182 | 5  | 0,0458 | 26 | 0,0000 | 0  | 0,0000 | 0  | 0,0000 | 0  | 0,0000 | 0  | 0,0107 | 31 | 0,02 |
| k_Bacteria;p_Proteobacteria;c_Deltaproteobacteria;o_Desulfovibrionales;f_Desulfovibrionaceae;g_Desulfovibrio | 0,0000 | 0  | 0,0071 | 4  | 0,0000 | 0  | 0,0000 | 0  | 0,0568 | 14 | 0,0000 | 0  | 0,0106 | 18 | 0,02 |
| k_Bacteria;p_Spirochaetes;c_Spirochaetes;o_Spirochaetales;f_Spirochaetaceae;g_Spirochaeta                    | 0,0000 | 0  | 0,0635 | 36 | 0,0000 | 0  | 0,0000 | 0  | 0,0000 | 0  | 0,0000 | 0  | 0,0106 | 36 | 0,03 |
| k_Bacteria;p_Bacteroidetes;c_Bacteroidia;o_Bacteroidales;f_Porphyromonadaceae;g_Porphyromonas                | 0,0000 | 0  | 0,0123 | 7  | 0,0172 | 12 | 0,0336 | 7  | 0,0000 | 0  | 0,0000 | 0  | 0,0105 | 26 | 0,01 |
| k_Bacteria;p_Proteobacteria;c_Betaproteobacteria;o_Methylotrophiales;f_Methylotrophilaceae;Other             | 0,0073 | 2  | 0,0071 | 4  | 0,0200 | 14 | 0,0000 | 0  | 0,0284 | 7  | 0,0000 | 0  | 0,0105 | 27 | 0,01 |
| k_Bacteria;p_Bacteroidetes;c_Sphingobacteriia;o_Sphingobacterales;f_NS11-12;g__                              | 0,0291 | 8  | 0,0035 | 2  | 0,0000 | 0  | 0,0000 | 0  | 0,0000 | 0  | 0,0301 | 15 | 0,0104 | 25 | 0,01 |
| k_Bacteria;p_Bacteroidetes;c_Flavobacteriia;o_Flavobacterales;f_Flavobacteriaceae;g_Salegentibacter          | 0,0036 | 1  | 0,0000 | 0  | 0,0172 | 12 | 0,0000 | 0  | 0,0406 | 10 | 0,0000 | 0  | 0,0102 | 23 | 0,02 |
| k_Bacteria;p_Firmicutes;c_Clostridia;o_Clostridiales;f_Tissierellaceae;g_Gallicola                           | 0,0327 | 9  | 0,0000 | 0  | 0,0000 | 0  | 0,0000 | 0  | 0,0284 | 7  | 0,0000 | 0  | 0,0102 | 16 | 0,02 |
| k_Bacteria;p_Proteobacteria;c_Alphaproteobacteria;o_Rhizobiales;f_Bartonellaceae;g__                         | 0,0036 | 1  | 0,0141 | 8  | 0,0000 | 0  | 0,0048 | 1  | 0,0365 | 9  | 0,0020 | 1  | 0,0102 | 20 | 0,01 |
| k_Bacteria;p_Verrucomicrobia;c_Opitutae;Other;Other;Other                                                    | 0,0218 | 6  | 0,0176 | 10 | 0,0214 | 15 | 0,0000 | 0  | 0,0000 | 0  | 0,0000 | 0  | 0,0101 | 31 | 0,01 |
| k_Bacteria;p_Acidobacteria;c_Chloracidobacteria;o_RB41;f_g__                                                 | 0,0000 | 0  | 0,0176 | 10 | 0,0000 | 0  | 0,0432 | 9  | 0,0000 | 0  | 0,0000 | 0  | 0,0101 | 19 | 0,02 |
| k_Bacteria;p_Verrucomicrobia;c_Opitutae;o_Punicococcales;f_Punicococaceae;g_Punicococcus                     | 0,0036 | 1  | 0,0018 | 1  | 0,0000 | 0  | 0,0432 | 9  | 0,0122 | 3  | 0,0000 | 0  | 0,0101 | 14 | 0,02 |
| k_Bacteria;p_Bacteroidetes;c_Cytophagia;o_Cytophagales;f_Amoebophilaceae;Other                               | 0,0000 | 0  | 0,0000 | 0  | 0,0000 | 0  | 0,0575 | 12 | 0,0000 | 0  | 0,0020 | 1  | 0,0099 | 13 | 0,02 |
| k_Bacteria;p_Proteobacteria;c_Gammaproteobacteria;o_Methylococcales;f_g__                                    | 0,0182 | 5  | 0,0088 | 5  | 0,0043 | 3  | 0,0000 | 0  | 0,0000 | 0  | 0,0281 | 14 | 0,0099 | 27 | 0,01 |
| k_Bacteria;p_Cyanobacteria;c_Oscillatoriophyceae;o_Chroococcales;f_g__                                       | 0,0073 | 2  | 0,0035 | 2  | 0,0000 | 0  | 0,0000 | 0  | 0,0122 | 3  | 0,0361 | 18 | 0,0098 | 25 | 0,01 |
| k_Bacteria;p_Proteobacteria;c_Gammaproteobacteria;o_Thiotrichales;f_Piscirickettsiaceae;g_Piscirickettsia    | 0,0036 | 1  | 0,0123 | 7  | 0,0014 | 1  | 0,0384 | 8  | 0,0000 | 0  | 0,0020 | 1  | 0,0096 | 18 | 0,01 |
| k_Bacteria;p_Plantomycetes;c_o_f_g__                                                                         | 0,0000 | 0  | 0,0000 | 0  | 0,0186 | 13 | 0,0336 | 7  | 0,0000 | 0  | 0,0040 | 2  | 0,0094 | 22 | 0,01 |
| k_Bacteria;p_Actinobacteria;c_Actinobacteria;o_Actinomycetales;f_Actinomycetaceae;g_Actinomycetes            | 0,0109 | 3  | 0,0194 | 11 | 0,0129 | 9  | 0,0000 | 0  | 0,0041 | 1  | 0,0080 | 4  | 0,0092 | 28 | 0,01 |
| k_Bacteria;p_Proteobacteria;c_Alphaproteobacteria;o_Kiloniellales;f_Kiloniellaceae;g_Thalassospira           | 0,0000 | 0  | 0,0511 | 29 | 0,0000 | 0  | 0,0000 | 0  | 0,0000 | 0  | 0,0040 | 2  | 0,0092 | 31 | 0,02 |
| k_Bacteria;p_Proteobacteria;c_Alphaproteobacteria;o_Rhodobacterales;f_Rhodobacteraceae;g_Anaerospira         | 0,0182 | 5  | 0,0141 | 8  | 0,0000 | 0  | 0,0000 | 0  | 0,0000 | 0  | 0,0221 | 11 | 0,0091 | 24 | 0,01 |
| k_Bacteria;p_Verrucomicrobia;c_Spartobacteria;o_Chtthoniobacteriales;f_Chtthoniobacteraceae;g_Ellin506       | 0,0000 | 0  | 0,0141 | 8  | 0,0000 | 0  | 0,0000 | 0  | 0,0000 | 0  | 0,0401 | 20 | 0,0090 | 28 | 0,02 |
| k_Bacteria;p_Actinobacteria;c_Actinobacteria;o_Actinomycetales;f_Propionibacteriaceae;g__                    | 0,0000 | 0  | 0,0441 | 25 | 0,0000 | 0  | 0,0096 | 2  | 0,0000 | 0  | 0,0000 | 0  | 0,0089 | 27 | 0,02 |
| k_Bacteria;p_Proteobacteria;c_Gammaproteobacteria;o_Xanthomonadales;f_Xanthomonadaceae;Other                 | 0,0291 | 8  | 0,0000 | 0  | 0,0000 | 0  | 0,0000 | 0  | 0,0243 | 6  | 0,0000 | 0  | 0,0089 | 14 | 0,01 |
| k_Bacteria;p_Chloroflexi;c_SAR202;o_f_g__                                                                    | 0,0000 | 0  | 0,0353 | 20 | 0,0000 | 0  | 0,0000 | 0  | 0,0000 | 0  | 0,0180 | 9  | 0,0089 | 29 | 0,01 |
| k_Bacteria;p_Proteobacteria;c_Alphaproteobacteria;o_Sphingomonadales;Other;Other                             | 0,0036 | 1  | 0,0141 | 8  | 0,0129 | 9  | 0,0000 | 0  | 0,0041 | 1  | 0,0180 | 9  | 0,0088 | 28 | 0,01 |
| k_Bacteria;p_Bacteroidetes;Other;Other;Other;Other                                                           | 0,0291 | 8  | 0,0000 | 0  | 0,0043 | 3  | 0,0048 | 1  | 0,0000 | 0  | 0,0140 | 7  | 0,0087 | 19 | 0,01 |
| k_Bacteria;p_Proteobacteria;c_Betaproteobacteria;o_Rhodocyclales;f_Rhodocyclaceae;g__                        | 0,0254 | 7  | 0,0000 | 0  | 0,0186 | 13 | 0,0000 | 0  | 0,0081 | 2  | 0,0000 | 0  | 0,0087 | 22 | 0,01 |
| k_Bacteria;p_Proteobacteria;c_Deltaproteobacteria;o_Desulfobacterales;f_Desulfobacteraceae;Other             | 0,0363 | 10 | 0,0053 | 3  | 0,0000 | 0  | 0,0000 | 0  | 0,0000 | 0  | 0,0100 | 5  | 0,0086 | 18 | 0,01 |
| k_Bacteria;p_Bacteroidetes;c_Saprosiriales;o_Saprosiriales;Other;Other                                       | 0,0000 | 0  | 0,0035 | 2  | 0,0000 | 0  | 0,0000 | 0  | 0,0000 | 0  | 0,0461 | 23 | 0,0083 | 25 | 0,02 |
| k_Bacteria;p_BRC1;c_PRR-11;o_f_g__                                                                           | 0,0000 | 0  | 0,0000 | 0  | 0,0086 | 6  | 0,0000 | 0  | 0,0324 | 8  | 0,0080 | 4  | 0,0082 | 18 | 0,01 |
| k_Bacteria;p_Actinobacteria;c_Actinobacteria;o_Actinomycetales;Other;Other                                   | 0,0000 | 0  | 0,0176 | 10 | 0,0100 | 7  | 0,0192 | 4  | 0,0000 | 0  | 0,0020 | 1  | 0,0081 | 22 | 0,01 |
| k_Bacteria;p_Bacteroidetes;c_Saprosiriales;o_Saprosiriales;f_Saprosiraceae;Other                             | 0,0073 | 2  | 0,0088 | 5  | 0,0057 | 4  | 0,0000 | 0  | 0,0041 | 1  | 0,0221 | 11 | 0,0080 | 23 | 0,01 |
| k_Bacteria;p_Actinobacteria;c_Actinobacteria;o_Actinomycetales;f_g__                                         | 0,0000 | 0  | 0,0000 | 0  | 0,0000 | 0  | 0,0336 | 7  | 0,0081 | 2  | 0,0060 | 3  | 0,0079 | 12 | 0,01 |
| k_Bacteria;p_Bacteroidetes;c_Cytophagia;o_Cytophagales;f_Amoebophilaceae;g_SGUS912                           | 0,0254 | 7  | 0,0159 | 9  | 0,0000 | 0  | 0,0000 | 0  | 0,0000 | 0  | 0,0060 | 3  | 0,0079 | 19 | 0,01 |
| k_Bacteria;p_Proteobacteria;c_Alphaproteobacteria;o_Rhodobacterales;f_Rhodobacteraceae;g_Amaricoccus         | 0,0000 | 0  | 0,0000 | 0  | 0,0329 | 23 | 0,0144 | 3  | 0,0000 | 0  | 0,0000 | 0  | 0,0079 | 26 | 0,01 |
| k_Bacteria;p_Actinobacteria;c_Actinobacteria;o_Bifidobacteriales;f_Bifidobacteriaceae;g_Bifidobacterium      | 0,0145 | 4  | 0,0123 | 7  | 0,0143 | 10 | 0,0000 | 0  | 0,0000 | 0  | 0,0060 | 3  | 0,0079 | 24 | 0,01 |
| k_Bacteria;p_Proteobacteria;c_Deltaproteobacteria;o_Myxococcales;f_OM27;g__                                  | 0,0145 | 4  | 0,0282 | 16 | 0,0000 | 0  | 0,0000 | 0  | 0,0000 | 0  | 0,0040 | 2  | 0,0078 | 22 | 0,01 |
| k_Bacteria;p_Verrucomicrobia;c_Verruco-5;o_MSL3;f_g__                                                        | 0,0254 | 7  | 0,0194 | 11 | 0,0014 | 1  | 0,0000 | 0  | 0,0000 | 0  | 0,0000 | 0  | 0,0077 | 19 | 0,01 |
| k_Bacteria;p_Actinobacteria;c_Acidimicrobia;o_Acidimicrobiales;f_ntu14;g__                                   | 0,0000 | 0  | 0,0159 | 9  | 0,0114 | 8  | 0,0000 | 0  | 0,0000 | 0  | 0,0180 | 9  | 0,0076 | 26 | 0,01 |
| k_Bacteria;p_Plantomycetes;c_Phycisphaerae;o_S-70;f_g__                                                      | 0,0073 | 2  | 0,0000 | 0  | 0,0114 | 8  | 0,0144 | 3  | 0,0122 | 3  | 0,0000 | 0  | 0,0075 | 16 | 0,01 |
| k_Bacteria;p_Proteobacteria;c_Gammaproteobacteria;o_Oceanospirillales;f_g__                                  | 0,0109 | 3  | 0,0123 | 7  | 0,0057 | 4  | 0,0000 | 0  | 0,0000 | 0  | 0,0160 | 8  | 0,0075 | 22 | 0,01 |
| k_Bacteria;p_Proteobacteria;c_Gammaproteobacteria;o_Thiotrichales;f_Piscirickettsiaceae;Other                | 0,0000 | 0  | 0,0000 | 0  | 0,0014 | 1  | 0,0432 | 9  | 0,0000 | 0  | 0,0000 | 0  | 0,0074 | 10 | 0,02 |
| k_Bacteria;p_Plantomycetes;c_Pla3;o_f_g__                                                                    | 0,0000 | 0  | 0,0000 | 0  | 0,0157 | 11 | 0,0288 | 6  | 0,0000 | 0  | 0,0000 | 0  | 0,0074 | 17 | 0,01 |
| k_Bacteria;p_Proteobacteria;c_Gammaproteobacteria;o_Legionellales;f_Legionellaceae;g_Legionella              | 0,0145 | 4  | 0,0088 | 5  | 0,0071 | 5  | 0,0096 | 2  | 0,0041 | 1  | 0,0000 | 0  | 0,0074 | 17 | 0,00 |
| k_Bacteria;p_Firmicutes;c_Clostridia;o_Clostridiales;f_Lachnospiraceae;g_Dorea                               | 0,0182 | 5  | 0,0000 | 0  | 0,0000 | 0  | 0,0000 | 0  | 0,0000 | 0  | 0,0241 | 12 | 0,0070 | 17 | 0,01 |
| k_Bacteria;p_Proteobacteria;c_Gammaproteobacteria;o_Pasteurellales;f_Pasteurellaceae;g_Haemophilus           | 0,0000 | 0  | 0,0282 | 16 | 0,0100 | 7  | 0,0000 | 0  | 0,0000 | 0  | 0,0040 | 2  | 0,0070 | 25 | 0,01 |
| k_Bacteria;p_Proteobacteria;c_Gammaproteobacteria;o_Chromatiales;Other;Other                                 | 0,0218 | 6  | 0,0000 | 0  | 0,0200 | 14 | 0,0000 | 0  | 0,0000 | 0  | 0,0000 | 0  | 0,0070 | 20 | 0,01 |
| k_Bacteria;p_Firmicutes;c_Bacilli;o_Bacillales;f_Staphylococaceae;g_Salinicoccus                             | 0,0000 | 0  | 0,0000 | 0  | 0,0000 | 0  | 0,0336 | 7  | 0,0081 | 2  | 0,0000 | 0  | 0,0069 | 9  | 0,01 |
| k_Bacteria;p_Proteobacteria;c_Gammaproteobacteria;o_Legionellales;Other;Other                                | 0,0073 | 2  | 0,0194 | 11 | 0,0143 | 10 | 0,0000 | 0  | 0,0000 | 0  | 0,0000 | 0  | 0,0068 | 23 | 0,01 |
| k_Bacteria;p_Proteobacteria;c_Gammaproteobacteria;o_Vibrionales;f_Pseudoalteromonadaceae;Other               | 0,0000 | 0  | 0,0264 | 15 | 0,0043 | 3  | 0,0000 | 0  | 0,0041 | 1  | 0,0060 | 3  | 0,0068 | 22 | 0,01 |
| k_Bacteria;p_Proteobacteria;c_Gammaproteobacteria;o_Pasteurellales;f_Pasteurellaceae;g_Actinobacillus        | 0,0000 | 0  | 0,0388 | 22 | 0,0000 | 0  | 0,0000 | 0  | 0,0000 | 0  | 0,0020 | 1  | 0,0068 | 23 | 0,02 |
| k_Bacteria;p_Bacteroidetes;c_Flavobacteriia;o_Flavobacterales;f_Flavobacteriaceae;g_Gramella                 | 0,0145 | 4  | 0,0000 | 0  | 0,0057 | 4  | 0,0000 | 0  | 0,0000 | 0  | 0,0201 | 10 | 0,0067 | 18 | 0,01 |
| k_Bacteria;p_Proteobacteria;c_Gammaproteobacteria;o_Vibrionales;f_Vibrionaceae;g_Photobacterium              | 0,0000 | 0  | 0,0035 | 2  | 0,0000 | 0  | 0,0336 | 7  | 0,0000 | 0  | 0,0020 | 1  | 0,0065 | 10 | 0,01 |
| k_Bacteria;p_Proteobacteria;c_Alphaproteobacteria;o_Caulobacteriales;f_Caulobacteraceae;Other                | 0,0145 | 4  | 0,0000 | 0  | 0,0000 | 0  | 0,0000 | 0  | 0,0243 | 6  | 0,0000 | 0  | 0,0065 | 10 | 0,01 |
| k_Bacteria;p_Bacteroidetes;c_Bacteroidia;o_Bacteroidales;Other;Other                                         | 0,0000 | 0  | 0,0000 | 0  | 0,0386 | 27 | 0,0000 | 0  | 0,0000 | 0  | 0,0000 | 0  | 0,0064 | 27 | 0,02 |

|                                                                                                               |        |   |        |    |        |    |        |   |        |   |        |    |        |    |      |
|---------------------------------------------------------------------------------------------------------------|--------|---|--------|----|--------|----|--------|---|--------|---|--------|----|--------|----|------|
| k_Bacteria;p_Actinobacteria;c_Actinobacteria;o_Bifidobacteriales;f_Bifidobacteriaceae;g_Bombiscardovia        | 0,0000 | 0 | 0,0000 | 0  | 0,0000 | 0  | 0,0384 | 8 | 0,0000 | 0 | 0,0000 | 0  | 0,0064 | 8  | 0,02 |
| k_Bacteria;p_Proteobacteria;c_Alphaproteobacteria;o_Rhizobiales;f_Hyphomicrobiae;g_Hyphomicrobium             | 0,0109 | 3 | 0,0141 | 8  | 0,0029 | 2  | 0,0000 | 0 | 0,0000 | 0 | 0,0100 | 5  | 0,0063 | 18 | 0,01 |
| k_Bacteria;p_TM6;c_SIA-4;o_f_g                                                                                | 0,0036 | 1 | 0,0000 | 0  | 0,0014 | 1  | 0,0000 | 0 | 0,0000 | 0 | 0,0321 | 16 | 0,0062 | 18 | 0,01 |
| k_Bacteria;p_Firmicutes;c_Clostridia;o_Clostridiales;f_Lachnospiraceae;g_Oribacterium                         | 0,0000 | 0 | 0,0000 | 0  | 0,0000 | 0  | 0,0000 | 0 | 0,0365 | 9 | 0,0000 | 0  | 0,0061 | 9  | 0,01 |
| k_Bacteria;p_Proteobacteria;c_Gammaproteobacteria;o_Alteromonadales;f_Alteromonadaceae;g_BD2-13               | 0,0254 | 7 | 0,0000 | 0  | 0,0086 | 6  | 0,0000 | 0 | 0,0000 | 0 | 0,0020 | 1  | 0,0060 | 14 | 0,01 |
| k_Bacteria;p_SBR1093;c_VHS-B5-50;o_f_g                                                                        | 0,0000 | 0 | 0,0000 | 0  | 0,0071 | 5  | 0,0288 | 6 | 0,0000 | 0 | 0,0000 | 0  | 0,0060 | 11 | 0,01 |
| k_Bacteria;p_Verrucomicrobia;c_Verrucomicrobiae;o_Verrucomicrobiales;f_Verrucomicrobiae;Other                 | 0,0109 | 3 | 0,0247 | 14 | 0,0000 | 0  | 0,0000 | 0 | 0,0000 | 0 | 0,0000 | 0  | 0,0059 | 17 | 0,01 |
| k_Bacteria;p_Plantomycetes;c_Plantomycetia;o_B97;f_g                                                          | 0,0254 | 7 | 0,0000 | 0  | 0,0000 | 0  | 0,0096 | 2 | 0,0000 | 0 | 0,0000 | 0  | 0,0058 | 9  | 0,01 |
| k_Bacteria;p_OP3;c_koll1;o_GIF10;f_kpj58rc;g                                                                  | 0,0254 | 7 | 0,0018 | 1  | 0,0057 | 4  | 0,0000 | 0 | 0,0000 | 0 | 0,0020 | 1  | 0,0058 | 13 | 0,01 |
| k_Bacteria;p_Proteobacteria;c_Gammaproteobacteria;o_Vibrionales;f_Vibrionaceae;g                              | 0,0182 | 5 | 0,0123 | 7  | 0,0000 | 0  | 0,0000 | 0 | 0,0000 | 0 | 0,0040 | 2  | 0,0058 | 14 | 0,01 |
| k_Bacteria;p_Spirochaetes;c_[Brachyspirae];o_[Brachyspirales];f_Brachyspiraceae;g                             | 0,0000 | 0 | 0,0000 | 0  | 0,0000 | 0  | 0,0000 | 0 | 0,0324 | 8 | 0,0020 | 1  | 0,0057 | 9  | 0,01 |
| k_Bacteria;p_Cyanobacteria;c_4C0d-2;o_MLE1-12;f_g                                                             | 0,0036 | 1 | 0,0000 | 0  | 0,0100 | 7  | 0,0000 | 0 | 0,0203 | 5 | 0,0000 | 0  | 0,0057 | 13 | 0,01 |
| k_Bacteria;p_Firmicutes;c_Clostridia;Other;Other;Other                                                        | 0,0000 | 0 | 0,0053 | 3  | 0,0000 | 0  | 0,0000 | 0 | 0,0284 | 7 | 0,0000 | 0  | 0,0056 | 10 | 0,01 |
| k_Bacteria;p_Firmicutes;c_Clostridia;o_Clostridiales;f_[Acidaminobacteraceae];g_WH1-8                         | 0,0036 | 1 | 0,0300 | 17 | 0,0000 | 0  | 0,0000 | 0 | 0,0000 | 0 | 0,0000 | 0  | 0,0056 | 18 | 0,01 |
| k_Bacteria;p_Firmicutes;c_Clostridia;o_Clostridiales;f_Veillonellaceae;g                                      | 0,0327 | 9 | 0,0000 | 0  | 0,0000 | 0  | 0,0000 | 0 | 0,0000 | 0 | 0,0000 | 0  | 0,0055 | 9  | 0,01 |
| k_Bacteria;p_Proteobacteria;c_Epsilonproteobacteria;o_Campylobacteriales;f_Campylobacteraceae;g_Campylobacter | 0,0327 | 9 | 0,0000 | 0  | 0,0000 | 0  | 0,0000 | 0 | 0,0000 | 0 | 0,0000 | 0  | 0,0055 | 9  | 0,01 |
| k_Bacteria;p_Plantomycetes;c_BD7-11;o_f_g                                                                     | 0,0182 | 5 | 0,0000 | 0  | 0,0000 | 0  | 0,0144 | 3 | 0,0000 | 0 | 0,0000 | 0  | 0,0054 | 8  | 0,01 |
| k_Bacteria;p_Bacteroidetes;c_Flavobacteriia;o_Flavobacteriales;f_NS9;g                                        | 0,0291 | 8 | 0,0000 | 0  | 0,0029 | 2  | 0,0000 | 0 | 0,0000 | 0 | 0,0000 | 0  | 0,0053 | 10 | 0,01 |
| k_Bacteria;p_Chloroflexi;c_Anaerolineae;o_Anaerolineales;f_Anaerolineaceae;g                                  | 0,0000 | 0 | 0,0000 | 0  | 0,0057 | 4  | 0,0000 | 0 | 0,0000 | 0 | 0,0261 | 13 | 0,0053 | 17 | 0,01 |
| k_Bacteria;p_Bacteroidetes;c_Flavobacteriia;o_Flavobacteriales;f_Cryomorphaceae;g_Crocinitomix                | 0,0000 | 0 | 0,0176 | 10 | 0,0000 | 0  | 0,0000 | 0 | 0,0000 | 0 | 0,0140 | 7  | 0,0053 | 17 | 0,01 |
| k_Bacteria;p_Bacteroidetes;c_Flavobacteriia;o_Flavobacteriales;f_Flavobacteriaceae;g_Psychrosperpens          | 0,0109 | 3 | 0,0106 | 6  | 0,0057 | 4  | 0,0000 | 0 | 0,0041 | 1 | 0,0000 | 0  | 0,0052 | 14 | 0,00 |
| k_Bacteria;p_Actinobacteria;c_Actinobacteria;o_Actinomycetales;f_Microbacteriaceae;g_Microbacterium           | 0,0109 | 3 | 0,0123 | 7  | 0,0071 | 5  | 0,0000 | 0 | 0,0000 | 0 | 0,0000 | 0  | 0,0051 | 15 | 0,01 |
| k_Bacteria;p_Proteobacteria;c_Gammaproteobacteria;o_Alteromonadales;f_Psychromonadaceae;g_Psychromonas        | 0,0145 | 4 | 0,0000 | 0  | 0,0157 | 11 | 0,0000 | 0 | 0,0000 | 0 | 0,0000 | 0  | 0,0050 | 15 | 0,01 |
| k_Bacteria;p_Firmicutes;c_Erysipelotrichi;o_Erysipelotrichales;f_Erysipelotrichaceae;g_[Eubacterium]          | 0,0000 | 0 | 0,0000 | 0  | 0,0000 | 0  | 0,0000 | 0 | 0,0000 | 0 | 0,0301 | 15 | 0,0050 | 15 | 0,01 |
| k_Bacteria;p_Bacteroidetes;c_Cytophagia;o_Cytophagales;f_Cytophagaceae;g                                      | 0,0109 | 3 | 0,0000 | 0  | 0,0086 | 6  | 0,0000 | 0 | 0,0000 | 0 | 0,0100 | 5  | 0,0049 | 14 | 0,01 |
| k_Bacteria;p_Proteobacteria;c_Alphaproteobacteria;o_Caulobacteriales;f_Caulobacteraceae;g_Brevundimonas       | 0,0291 | 8 | 0,0000 | 0  | 0,0000 | 0  | 0,0000 | 0 | 0,0000 | 0 | 0,0000 | 0  | 0,0048 | 8  | 0,01 |
| k_Bacteria;p_Proteobacteria;c_Deltaproteobacteria;o_Bdellovibrionales;f_Bacteriovoracaceae;g_Bacteriovorax    | 0,0291 | 8 | 0,0000 | 0  | 0,0000 | 0  | 0,0000 | 0 | 0,0000 | 0 | 0,0000 | 0  | 0,0048 | 8  | 0,01 |
| k_Bacteria;p_Nitrospirae;c_Nitrospira;o_Nitrospirales;f_Nitrospiraceae;g_Nitrospira                           | 0,0000 | 0 | 0,0000 | 0  | 0,0000 | 0  | 0,0288 | 6 | 0,0000 | 0 | 0,0000 | 0  | 0,0048 | 6  | 0,01 |
| k_Bacteria;p_Proteobacteria;c_Gammaproteobacteria;o_Chromatiales;f_Ectothiorhodospiraceae;g                   | 0,0073 | 2 | 0,0000 | 0  | 0,0214 | 15 | 0,0000 | 0 | 0,0000 | 0 | 0,0000 | 0  | 0,0048 | 17 | 0,01 |
| k_Bacteria;p_Proteobacteria;c_Betaproteobacteria;o_Neisseriales;f_Neisseriaceae;Other                         | 0,0000 | 0 | 0,0000 | 0  | 0,0000 | 0  | 0,0000 | 0 | 0,0284 | 7 | 0,0000 | 0  | 0,0047 | 7  | 0,01 |
| k_Bacteria;p_Proteobacteria;c_Deltaproteobacteria;o_Sva0853;Other;Other                                       | 0,0036 | 1 | 0,0053 | 3  | 0,0000 | 0  | 0,0192 | 4 | 0,0000 | 0 | 0,0000 | 0  | 0,0047 | 8  | 0,01 |
| k_Bacteria;p_Proteobacteria;c_Deltaproteobacteria;o_Bdellovibrionales;f_Bacteriovoracaceae;Other              | 0,0036 | 1 | 0,0141 | 8  | 0,0029 | 2  | 0,0048 | 1 | 0,0000 | 0 | 0,0020 | 1  | 0,0046 | 13 | 0,00 |
| k_Bacteria;p_OD1;c_ZB2;o_f_g                                                                                  | 0,0000 | 0 | 0,0012 | 12 | 0,0000 | 0  | 0,0000 | 0 | 0,0000 | 0 | 0,0060 | 3  | 0,0045 | 15 | 0,01 |
| k_Bacteria;p_Bacteroidetes;c_Flavobacteriia;o_Flavobacteriales;f_Flavobacteriaceae;g_Aquimarina               | 0,0000 | 0 | 0,0000 | 0  | 0,0014 | 1  | 0,0144 | 3 | 0,0000 | 0 | 0,0100 | 5  | 0,0043 | 9  | 0,01 |
| k_Bacteria;p_Plantomycetes;c_Phycisphaerae;o_Phycisphaerales;f_Phycisphaeraceae;Other                         | 0,0000 | 0 | 0,0000 | 0  | 0,0000 | 0  | 0,0096 | 2 | 0,0162 | 4 | 0,0000 | 0  | 0,0043 | 6  | 0,01 |
| k_Bacteria;p_Proteobacteria;c_Gammaproteobacteria;o_Alteromonadales;f_[Chromatiaceae];g                       | 0,0000 | 0 | 0,0141 | 8  | 0,0114 | 8  | 0,0000 | 0 | 0,0000 | 0 | 0,0000 | 0  | 0,0043 | 16 | 0,01 |
| k_Bacteria;p_Actinobacteria;c_Actinobacteria;o_Actinomycetales;f_Cellulomonadaceae;Other                      | 0,0254 | 7 | 0,0000 | 0  | 0,0000 | 0  | 0,0000 | 0 | 0,0000 | 0 | 0,0000 | 0  | 0,0042 | 7  | 0,01 |
| k_Bacteria;p_Chloroflexi;c_Anaerolineae;o_SB-34;f_g                                                           | 0,0254 | 7 | 0,0000 | 0  | 0,0000 | 0  | 0,0000 | 0 | 0,0000 | 0 | 0,0000 | 0  | 0,0042 | 7  | 0,01 |
| k_Bacteria;p_Proteobacteria;c_Alphaproteobacteria;o_Rhizobiales;f_Bradyrhizobiaceae;Other                     | 0,0254 | 7 | 0,0000 | 0  | 0,0000 | 0  | 0,0000 | 0 | 0,0000 | 0 | 0,0000 | 0  | 0,0042 | 7  | 0,01 |
| k_Bacteria;p_Actinobacteria;c_Thermoleophilii;o_Gaellales;f_g                                                 | 0,0000 | 0 | 0,0000 | 0  | 0,0172 | 12 | 0,0000 | 0 | 0,0000 | 0 | 0,0080 | 4  | 0,0042 | 16 | 0,01 |
| k_Bacteria;p_Bacteroidetes;c_Flavobacteriia;o_Flavobacteriales;f_[Weissellaceae];g                            | 0,0218 | 6 | 0,0018 | 1  | 0,0014 | 1  | 0,0000 | 0 | 0,0000 | 0 | 0,0000 | 0  | 0,0042 | 8  | 0,01 |
| k_Bacteria;p_Actinobacteria;c_Acidimicrobia;o_Acidimicrobiales;f_koll13;g                                     | 0,0036 | 1 | 0,0212 | 12 | 0,0000 | 0  | 0,0000 | 0 | 0,0000 | 0 | 0,0000 | 0  | 0,0041 | 13 | 0,01 |
| k_Bacteria;p_Cyanobacteria;c_4C0d-2;o_YS2;f_g                                                                 | 0,0000 | 0 | 0,0035 | 2  | 0,0000 | 0  | 0,0048 | 1 | 0,0162 | 4 | 0,0000 | 0  | 0,0041 | 7  | 0,01 |
| k_Bacteria;p_Proteobacteria;c_Betaproteobacteria;o_Burkholderiales;f_Oxalobacteraceae;g_Janthinobacterium     | 0,0000 | 0 | 0,0000 | 0  | 0,0000 | 0  | 0,0000 | 0 | 0,0243 | 6 | 0,0000 | 0  | 0,0041 | 6  | 0,01 |
| k_Bacteria;p_Proteobacteria;c_Epsilonproteobacteria;o_Campylobacteriales;f_Helicobacteraceae;g_Sulfurimonas   | 0,0000 | 0 | 0,0000 | 0  | 0,0000 | 0  | 0,0000 | 0 | 0,0243 | 6 | 0,0000 | 0  | 0,0041 | 6  | 0,01 |
| k_Bacteria;p_Proteobacteria;c_Alphaproteobacteria;o_Rhodobacteriales;f_Rhodobacteraceae;g_Roseisalinus        | 0,0000 | 0 | 0,0000 | 0  | 0,0000 | 0  | 0,0000 | 0 | 0,0203 | 5 | 0,0040 | 2  | 0,0040 | 7  | 0,01 |
| k_Bacteria;p_Actinobacteria;c_Actinobacteria;o_Actinomycetales;f_Brevibacteriaceae;g_Brevibacterium           | 0,0000 | 0 | 0,0000 | 0  | 0,0000 | 0  | 0,0000 | 0 | 0,0000 | 0 | 0,0241 | 12 | 0,0040 | 12 | 0,01 |
| k_Bacteria;p_Proteobacteria;c_Gammaproteobacteria;o_Oceanospirillales;f_Oceanospirillaceae;g_Oceanospirillum  | 0,0000 | 0 | 0,0000 | 0  | 0,0000 | 0  | 0,0000 | 0 | 0,0000 | 0 | 0,0241 | 12 | 0,0040 | 12 | 0,01 |
| k_Bacteria;p_Bacteroidetes;c_SM1A07;o_f_g                                                                     | 0,0000 | 0 | 0,0000 | 0  | 0,0000 | 0  | 0,0240 | 5 | 0,0000 | 0 | 0,0000 | 0  | 0,0040 | 5  | 0,01 |
| k_Bacteria;p_Firmicutes;c_Bacilli;o_Lactobacillales;f_Leuconostocaceae;g_Weissella                            | 0,0000 | 0 | 0,0000 | 0  | 0,0000 | 0  | 0,0240 | 5 | 0,0000 | 0 | 0,0000 | 0  | 0,0040 | 5  | 0,01 |
| k_Bacteria;p_Fusobacteria;c_Fusobacteriia;o_Fusobacteriales;f_Leptotrichiaceae;g                              | 0,0000 | 0 | 0,0000 | 0  | 0,0000 | 0  | 0,0240 | 5 | 0,0000 | 0 | 0,0000 | 0  | 0,0040 | 5  | 0,01 |
| k_Bacteria;p_Bacteroidetes;c_Flavobacteriia;o_Flavobacteriales;f_Flavobacteriaceae;g_Ulvibacter               | 0,0000 | 0 | 0,0159 | 9  | 0,0000 | 0  | 0,0000 | 0 | 0,0000 | 0 | 0,0080 | 4  | 0,0040 | 13 | 0,01 |
| k_Bacteria;p_Proteobacteria;c_Gammaproteobacteria;o_Alteromonadales;f_Idiomarinaceae;Other                    | 0,0218 | 6 | 0,0000 | 0  | 0,0014 | 1  | 0,0000 | 0 | 0,0000 | 0 | 0,0000 | 0  | 0,0039 | 7  | 0,01 |
| k_Bacteria;p_Proteobacteria;c_Betaproteobacteria;o_Methylophilales;f_Methylophilaceae;g                       | 0,0000 | 0 | 0,0000 | 0  | 0,0000 | 0  | 0,0192 | 4 | 0,0000 | 0 | 0,0040 | 2  | 0,0039 | 6  | 0,01 |
| k_Bacteria;p_Proteobacteria;c_Gammaproteobacteria;o_Alteromonadales;f_g                                       | 0,0000 | 0 | 0,0018 | 1  | 0,0000 | 0  | 0,0192 | 4 | 0,0000 | 0 | 0,0020 | 1  | 0,0038 | 6  | 0,01 |
| k_Bacteria;p_Proteobacteria;c_Deltaproteobacteria;Other;Other;Other                                           | 0,0109 | 3 | 0,0088 | 5  | 0,0029 | 2  | 0,0000 | 0 | 0,0000 | 0 | 0,0000 | 0  | 0,0038 | 10 | 0,00 |
| k_Bacteria;p_Plantomycetes;c_C6;o_d113;f_g                                                                    | 0,0000 | 0 | 0,0000 | 0  | 0,0000 | 0  | 0,0000 | 0 | 0,0000 | 0 | 0,0221 | 11 | 0,0037 | 11 | 0,01 |
| k_Bacteria;p_Bacteroidetes;c_Bacteroidia;o_Bacteroidales;f_SB-1;g                                             | 0,0218 | 6 | 0,0000 | 0  | 0,0000 | 0  | 0,0000 | 0 | 0,0000 | 0 | 0,0000 | 0  | 0,0036 | 6  | 0,01 |
| k_Bacteria;p_Cyanobacteria;c_Synechococcophycidae;o_Pseudanabaenales;Other;Other                              | 0,0000 | 0 | 0,0000 | 0  | 0,0071 | 5  | 0,0000 | 0 | 0,0000 | 0 | 0,0140 | 7  | 0,0035 | 12 | 0,01 |
| k_Bacteria;p_Proteobacteria;c_Gammaproteobacteria;o_Oceanospirillales;f_Oleiphilaceae;g                       | 0,0036 | 1 | 0,0018 | 1  | 0,0029 | 2  | 0,0048 | 1 | 0,0000 | 0 | 0,0080 | 4  | 0,0035 | 9  | 0,00 |
| k_Bacteria;p_Firmicutes;c_Bacilli;o_Gemellales;f_Gemellaceae;Other                                            | 0,0000 | 0 | 0,0035 | 2  | 0,0000 | 0  | 0,0000 | 0 | 0,0162 | 4 | 0,0000 | 0  | 0,0033 | 6  | 0,01 |
| k_Bacteria;p_WPS-2;c_o_f_g                                                                                    | 0,0000 | 0 | 0,0194 | 11 | 0,0000 | 0  | 0,0000 | 0 | 0,0000 | 0 | 0,0000 | 0  | 0,0032 | 11 | 0,01 |
| k_Bacteria;p_Bacteroidetes;c_Flavobacteriia;o_Flavobacteriales;f_Flavobacteriaceae;g_Robiginitalea            | 0,0073 | 2 | 0,0000 | 0  | 0,0000 | 0  | 0,0000 | 0 | 0,0000 | 0 | 0,0120 | 6  | 0,0032 | 8  | 0,01 |
| k_Bacteria;p_Actinobacteria;c_Coriobacteriia;o_Coriobacteriales;f_Coriobacteriaceae;g_Atopobium               | 0,0000 | 0 | 0,0000 | 0  | 0,0000 | 0  | 0,0192 | 4 | 0,0000 | 0 | 0,0000 | 0  | 0,0032 | 4  | 0,01 |
| k_Bacteria;p_Firmicutes;c_Clostridia;o_Clostridiales;f_Veillonellaceae;g_Selenomonas                          | 0,0000 | 0 | 0,0000 | 0  | 0,0000 | 0  | 0,0192 | 4 | 0,0000 | 0 | 0,0000 | 0  | 0,0032 | 4  | 0,01 |
| k_Bacteria;p_Plantomycetes;c_Phycisphaerae;o_SHUX583;f_g                                                      | 0,0000 | 0 | 0,0000 | 0  | 0,0000 | 0  | 0,0192 | 4 | 0,0000 | 0 | 0,0000 | 0  | 0,0032 | 4  | 0,01 |
| k_Bacteria;p_Firmicutes;c_Bacilli;o_Lactobacillales;f_Enterococcaceae;g_Enterococcus                          | 0,0182 | 5 | 0,0000 | 0  | 0,0000 | 0  | 0,0000 | 0 | 0,0000 | 0 | 0,0000 | 0  | 0,0030 | 5  | 0,01 |
| k_Bacteria;p_Bacteroidetes;c_Cytophagia;o_Cytophagales;f_Cytophagaceae;g_Leadbetterella                       | 0,0000 | 0 | 0,0000 | 0  | 0,0000 | 0  | 0,0000 | 0 | 0,0000 | 0 | 0,0180 | 9  | 0,0030 | 9  | 0,01 |
| k_Bacteria;p_Plantomycetes;c_Phycisphaerae;Other;Other;Other                                                  | 0,0000 | 0 | 0,0000 | 0  | 0,0172 | 12 | 0,0000 | 0 | 0,0000 | 0 | 0,0000 | 0  | 0,0029 | 12 | 0,01 |

|                                                                                                              |        |   |        |   |        |    |        |   |        |   |        |   |        |    |      |
|--------------------------------------------------------------------------------------------------------------|--------|---|--------|---|--------|----|--------|---|--------|---|--------|---|--------|----|------|
| k_Bacteria;p_Actinobacteria;c_Actinobacteria;o_Actinomycetales;f_Nocardiaceae;g_Rhodococcus                  | 0,0109 | 3 | 0,0000 | 0 | 0,0057 | 4  | 0,0000 | 0 | 0,0000 | 0 | 0,0000 | 0 | 0,0028 | 7  | 0,00 |
| k_Bacteria;p_Actinobacteria;c_Actinobacteria;o_Actinomycetales;f_Microbacteriaceae;Other                     | 0,0000 | 0 | 0,0000 | 0 | 0,0000 | 0  | 0,0000 | 0 | 0,0162 | 4 | 0,0000 | 0 | 0,0027 | 4  | 0,01 |
| k_Bacteria;p_Bacteroidetes;c_Cytophagia;o_Cytophagales;f_Cytophagaceae;g_Dyadobacter                         | 0,0000 | 0 | 0,0000 | 0 | 0,0000 | 0  | 0,0000 | 0 | 0,0162 | 4 | 0,0000 | 0 | 0,0027 | 4  | 0,01 |
| k_Bacteria;p_Actinobacteria;c_Nitriliruptoria;o_Euzebyales;f_Euzebyaceae;g_Euzebya                           | 0,0000 | 0 | 0,0000 | 0 | 0,0000 | 0  | 0,0000 | 0 | 0,0000 | 0 | 0,0160 | 8 | 0,0027 | 8  | 0,01 |
| k_Bacteria;p_Firmicutes;c_Clostridia;o_Clostridiales;f_[Tissierellaceae];g_1-68                              | 0,0000 | 0 | 0,0018 | 1 | 0,0000 | 0  | 0,0000 | 0 | 0,0000 | 0 | 0,0140 | 7 | 0,0026 | 8  | 0,01 |
| k_Bacteria;p_Chloroflexi;c_Anaerolineae;o_S0208;f_;g_                                                        | 0,0000 | 0 | 0,0000 | 0 | 0,0157 | 11 | 0,0000 | 0 | 0,0000 | 0 | 0,0000 | 0 | 0,0026 | 11 | 0,01 |
| k_Bacteria;p_Plantomycetes;c_vadinHA49;o_PeHg47;f_;g_                                                        | 0,0000 | 0 | 0,0000 | 0 | 0,0157 | 11 | 0,0000 | 0 | 0,0000 | 0 | 0,0000 | 0 | 0,0026 | 11 | 0,01 |
| k_Bacteria;p_Proteobacteria;c_Deltaproteobacteria;o_Desulfobacterales;f_Desulfobacteraceae;g_Desulfosarcina  | 0,0000 | 0 | 0,0000 | 0 | 0,0157 | 11 | 0,0000 | 0 | 0,0000 | 0 | 0,0000 | 0 | 0,0026 | 11 | 0,01 |
| k_Bacteria;p_Verrucomicrobia;c_[Spartobacteria];o_[Chthoniobacterales];f_[Chthoniobacteraceae];g_            | 0,0000 | 0 | 0,0035 | 2 | 0,0000 | 0  | 0,0000 | 0 | 0,0122 | 3 | 0,0000 | 0 | 0,0026 | 5  | 0,00 |
| k_Bacteria;p_Bacteroidetes;c_Bacteroidia;o_Bacteroidales;f_[Odoribacteraceae];g_Odoribacter                  | 0,0000 | 0 | 0,0000 | 0 | 0,0114 | 8  | 0,0000 | 0 | 0,0000 | 0 | 0,0040 | 2 | 0,0026 | 10 | 0,00 |
| k_Bacteria;p_Actinobacteria;c_Actinobacteria;o_Actinomycetales;f_Intrasporangiaceae;g_                       | 0,0000 | 0 | 0,0000 | 0 | 0,0071 | 5  | 0,0000 | 0 | 0,0000 | 0 | 0,0080 | 4 | 0,0025 | 9  | 0,00 |
| k_Bacteria;p_Lentisphaerae;c_[Lentisphaeria];Other;Other;Other                                               | 0,0036 | 1 | 0,0000 | 0 | 0,0114 | 8  | 0,0000 | 0 | 0,0000 | 0 | 0,0000 | 0 | 0,0025 | 9  | 0,00 |
| k_Bacteria;p_Chloroflexi;c_Anaerolineae;o_MSB-1E9;f_;g_                                                      | 0,0145 | 4 | 0,0000 | 0 | 0,0000 | 0  | 0,0000 | 0 | 0,0000 | 0 | 0,0000 | 0 | 0,0024 | 4  | 0,01 |
| k_Bacteria;p_Bacteroidetes;c_Flavobacteriia;o_Flavobacteriales;f_Flavobacteriaceae;g_Cellulophaga            | 0,0036 | 1 | 0,0018 | 1 | 0,0029 | 2  | 0,0000 | 0 | 0,0041 | 1 | 0,0020 | 1 | 0,0024 | 6  | 0,00 |
| k_Bacteria;p_Bacteroidetes;c_Flavobacteriia;o_Flavobacteriales;f_Flavobacteriaceae;g_Capnocytophaga          | 0,0000 | 0 | 0,0000 | 0 | 0,0000 | 0  | 0,0000 | 0 | 0,0000 | 0 | 0,0140 | 7 | 0,0023 | 7  | 0,01 |
| k_Bacteria;p_Plantomycetes;c_Phycisphaerae;o_Phycisphaerales;Other;Other                                     | 0,0000 | 0 | 0,0000 | 0 | 0,0043 | 3  | 0,0096 | 2 | 0,0000 | 0 | 0,0000 | 0 | 0,0023 | 5  | 0,00 |
| k_Bacteria;p_Proteobacteria;c_Deltaproteobacteria;o_GMD14H09;f_;g_                                           | 0,0000 | 0 | 0,0018 | 1 | 0,0000 | 0  | 0,0000 | 0 | 0,0041 | 1 | 0,0080 | 4 | 0,0023 | 6  | 0,00 |
| k_Bacteria;p_OP8;c_OP8_2;o_f_;g_                                                                             | 0,0000 | 0 | 0,0000 | 0 | 0,0129 | 9  | 0,0000 | 0 | 0,0000 | 0 | 0,0000 | 0 | 0,0021 | 9  | 0,01 |
| k_Bacteria;p_Proteobacteria;c_Deltaproteobacteria;o_NB1-j;f_;g_                                              | 0,0000 | 0 | 0,0000 | 0 | 0,0129 | 9  | 0,0000 | 0 | 0,0000 | 0 | 0,0000 | 0 | 0,0021 | 9  | 0,01 |
| k_Bacteria;p_Proteobacteria;c_Deltaproteobacteria;o_Myxococcales;f_Haliangiaceae;g_Haliangium                | 0,0000 | 0 | 0,0088 | 5 | 0,0000 | 0  | 0,0000 | 0 | 0,0000 | 0 | 0,0040 | 2 | 0,0021 | 7  | 0,00 |
| k_Bacteria;p_Proteobacteria;c_Gammaproteobacteria;o_Alteromonadales;f_211ds20;g_                             | 0,0000 | 0 | 0,0123 | 7 | 0,0000 | 0  | 0,0000 | 0 | 0,0000 | 0 | 0,0000 | 0 | 0,0021 | 7  | 0,01 |
| k_Bacteria;p_Actinobacteria;c_Acidimicrobia;o_Acidimicrobiales;f_EB1017;g_                                   | 0,0000 | 0 | 0,0000 | 0 | 0,0000 | 0  | 0,0000 | 0 | 0,0122 | 3 | 0,0000 | 0 | 0,0020 | 3  | 0,00 |
| k_Bacteria;p_Proteobacteria;c_Alphaproteobacteria;o_Rhodobacterales;f_Rhodobacteraceae;g_Rubellimicrobium    | 0,0000 | 0 | 0,0000 | 0 | 0,0000 | 0  | 0,0000 | 0 | 0,0122 | 3 | 0,0000 | 0 | 0,0020 | 3  | 0,00 |
| k_Bacteria;p_Proteobacteria;c_Gammaproteobacteria;o_Alteromonadales;f_Alteromonadaceae;g_Microbulbifer       | 0,0000 | 0 | 0,0035 | 2 | 0,0000 | 0  | 0,0000 | 0 | 0,0000 | 0 | 0,0080 | 4 | 0,0019 | 6  | 0,00 |
| k_Bacteria;p_Proteobacteria;c_Gammaproteobacteria;o_Enterobacteriales;f_Enterobacteriaceae;g_Cronobacter     | 0,0000 | 0 | 0,0018 | 1 | 0,0057 | 4  | 0,0000 | 0 | 0,0041 | 1 | 0,0000 | 0 | 0,0019 | 6  | 0,00 |
| k_Bacteria;p_Firmicutes;c_Bacilli;o_Lactobacillales;f_Aerococcaceae;g_Aerococcus                             | 0,0000 | 0 | 0,0000 | 0 | 0,0114 | 8  | 0,0000 | 0 | 0,0000 | 0 | 0,0000 | 0 | 0,0019 | 8  | 0,00 |
| k_Bacteria;p_Proteobacteria;c_Gammaproteobacteria;o_Cardiobacteriales;f_Cardiobacteriaceae;g_Cardiobacterium | 0,0000 | 0 | 0,0000 | 0 | 0,0114 | 8  | 0,0000 | 0 | 0,0000 | 0 | 0,0000 | 0 | 0,0019 | 8  | 0,00 |
| k_Bacteria;p_Proteobacteria;c_Alphaproteobacteria;o_Rhizobiales;f_Methyllobacteriaceae;g_Methyllobacterium   | 0,0000 | 0 | 0,0000 | 0 | 0,0071 | 5  | 0,0000 | 0 | 0,0000 | 0 | 0,0040 | 2 | 0,0019 | 7  | 0,00 |
| k_Bacteria;p_Actinobacteria;c_Actinobacteria;o_Actinomycetales;f_Intrasporangiaceae;g_Serinococcus           | 0,0109 | 3 | 0,0000 | 0 | 0,0000 | 0  | 0,0000 | 0 | 0,0000 | 0 | 0,0000 | 0 | 0,0018 | 3  | 0,00 |
| k_Bacteria;p_Actinobacteria;c_Actinobacteria;o_Actinomycetales;f_Micrococcaceae;g_                           | 0,0109 | 3 | 0,0000 | 0 | 0,0000 | 0  | 0,0000 | 0 | 0,0000 | 0 | 0,0000 | 0 | 0,0018 | 3  | 0,00 |
| k_Bacteria;p_Actinobacteria;c_Actinobacteria;o_Actinomycetales;f_Nocardioidaceae;g_                          | 0,0109 | 3 | 0,0000 | 0 | 0,0000 | 0  | 0,0000 | 0 | 0,0000 | 0 | 0,0000 | 0 | 0,0018 | 3  | 0,00 |
| k_Bacteria;p_Chloroflexi;c_Anaerolineae;o_GCA004;f_;g_                                                       | 0,0109 | 3 | 0,0000 | 0 | 0,0000 | 0  | 0,0000 | 0 | 0,0000 | 0 | 0,0000 | 0 | 0,0018 | 3  | 0,00 |
| k_Bacteria;p_Chloroflexi;c_Thermomicrobia;o_JG30-KF-CM45;f_;g_                                               | 0,0109 | 3 | 0,0000 | 0 | 0,0000 | 0  | 0,0000 | 0 | 0,0000 | 0 | 0,0000 | 0 | 0,0018 | 3  | 0,00 |
| k_Bacteria;p_Proteobacteria;c_Alphaproteobacteria;o_Rhizobiales;f_Rhizobiaceae;g_Agrobacterium               | 0,0109 | 3 | 0,0000 | 0 | 0,0000 | 0  | 0,0000 | 0 | 0,0000 | 0 | 0,0000 | 0 | 0,0018 | 3  | 0,00 |
| k_Bacteria;p_Proteobacteria;c_Alphaproteobacteria;o_Rickettsiales;f_mitochondria;Other                       | 0,0109 | 3 | 0,0000 | 0 | 0,0000 | 0  | 0,0000 | 0 | 0,0000 | 0 | 0,0000 | 0 | 0,0018 | 3  | 0,00 |
| k_Bacteria;p_Verrucomicrobia;c_[Pedosphaerae];o_[Pedosphaerales];f_;g_                                       | 0,0109 | 3 | 0,0000 | 0 | 0,0000 | 0  | 0,0000 | 0 | 0,0000 | 0 | 0,0000 | 0 | 0,0018 | 3  | 0,00 |
| k_Bacteria;p_Bacteroidetes;c_Flavobacteriia;o_Flavobacteriales;f_[Weeksellaceae];g_Wautersiella              | 0,0036 | 1 | 0,0071 | 4 | 0,0000 | 0  | 0,0000 | 0 | 0,0000 | 0 | 0,0000 | 0 | 0,0018 | 5  | 0,00 |
| k_Bacteria;p_Actinobacteria;c_Actinobacteria;o_Actinomycetales;f_Microbacteriaceae;g_Leucobacter             | 0,0000 | 0 | 0,0106 | 6 | 0,0000 | 0  | 0,0000 | 0 | 0,0000 | 0 | 0,0000 | 0 | 0,0018 | 6  | 0,00 |
| k_Bacteria;p_Proteobacteria;c_Deltaproteobacteria;o_Desulfobacterales;f_Desulfobacteraceae;g_Desulfococcus   | 0,0000 | 0 | 0,0106 | 6 | 0,0000 | 0  | 0,0000 | 0 | 0,0000 | 0 | 0,0000 | 0 | 0,0018 | 6  | 0,00 |
| k_Bacteria;p_Proteobacteria;c_Gammaproteobacteria;o_Chromatiales;f_Ectothiorhodospiraceae;g_Halorhodospira   | 0,0000 | 0 | 0,0106 | 6 | 0,0000 | 0  | 0,0000 | 0 | 0,0000 | 0 | 0,0000 | 0 | 0,0018 | 6  | 0,00 |
| k_Bacteria;p_Proteobacteria;c_Deltaproteobacteria;o_f_;g_                                                    | 0,0000 | 0 | 0,0071 | 4 | 0,0014 | 1  | 0,0000 | 0 | 0,0000 | 0 | 0,0020 | 1 | 0,0017 | 6  | 0,00 |
| k_Bacteria;p_Spirochaetes;c_Spirochaetes;o_Spirochaetales;f_Spirochaetaceae;g_Treponema                      | 0,0000 | 0 | 0,0000 | 0 | 0,0043 | 3  | 0,0000 | 0 | 0,0000 | 0 | 0,0060 | 3 | 0,0017 | 6  | 0,00 |
| k_Bacteria;p_Proteobacteria;c_Gammaproteobacteria;o_Aeromonadales;f_Aeromonadaceae;g_                        | 0,0000 | 0 | 0,0000 | 0 | 0,0000 | 0  | 0,0000 | 0 | 0,0081 | 2 | 0,0020 | 1 | 0,0017 | 3  | 0,00 |
| k_Bacteria;p_Actinobacteria;c_Actinobacteria;o_Actinomycetales;f_Micrococcaceae;g_Kocuria                    | 0,0000 | 0 | 0,0000 | 0 | 0,0000 | 0  | 0,0000 | 0 | 0,0000 | 0 | 0,0100 | 5 | 0,0017 | 5  | 0,00 |
| k_Bacteria;p_Proteobacteria;c_Gammaproteobacteria;o_Pasteurellales;f_Pasteurellaceae;g_Aggregatibacter       | 0,0000 | 0 | 0,0000 | 0 | 0,0000 | 0  | 0,0000 | 0 | 0,0000 | 0 | 0,0100 | 5 | 0,0017 | 5  | 0,00 |
| k_Bacteria;p_Acidobacteria;c_Acidobacteria-6;o_iii1-15;f_mb2424;g_                                           | 0,0000 | 0 | 0,0000 | 0 | 0,0000 | 0  | 0,0096 | 2 | 0,0000 | 0 | 0,0000 | 0 | 0,0016 | 2  | 0,00 |
| k_Bacteria;p_Proteobacteria;c_Alphaproteobacteria;o_Rhodobacterales;f_Rhodobacteraceae;g_Dinoroseobacter     | 0,0000 | 0 | 0,0000 | 0 | 0,0000 | 0  | 0,0096 | 2 | 0,0000 | 0 | 0,0000 | 0 | 0,0016 | 2  | 0,00 |
| k_Bacteria;p_Proteobacteria;c_Gammaproteobacteria;o_Pseudomonadales;f_Moraxellaceae;g_Enhydrobacter          | 0,0000 | 0 | 0,0000 | 0 | 0,0000 | 0  | 0,0096 | 2 | 0,0000 | 0 | 0,0000 | 0 | 0,0016 | 2  | 0,00 |
| k_Bacteria;p_Verrucomicrobia;c_[Spartobacteria];o_[Chthoniobacterales];Other;Other                           | 0,0000 | 0 | 0,0000 | 0 | 0,0000 | 0  | 0,0096 | 2 | 0,0000 | 0 | 0,0000 | 0 | 0,0016 | 2  | 0,00 |
| k_Bacteria;p_Proteobacteria;c_Gammaproteobacteria;o_Chromatiales;f_Ectothiorhodospiraceae;Other              | 0,0000 | 0 | 0,0053 | 3 | 0,0000 | 0  | 0,0000 | 0 | 0,0000 | 0 | 0,0040 | 2 | 0,0016 | 5  | 0,00 |
| k_Bacteria;p_Firmicutes;c_Clostridia;o_Clostridiales;f_Lachnospiraceae;g_                                    | 0,0073 | 2 | 0,0000 | 0 | 0,0000 | 0  | 0,0000 | 0 | 0,0000 | 0 | 0,0020 | 1 | 0,0015 | 3  | 0,00 |
| k_Bacteria;p_Bacteroidetes;c_[Saprospirae];o_[Saprospirales];f_Chitinophagaceae;Other                        | 0,0036 | 1 | 0,0000 | 0 | 0,0014 | 1  | 0,0000 | 0 | 0,0041 | 1 | 0,0000 | 0 | 0,0015 | 3  | 0,00 |
| k_Bacteria;p_Actinobacteria;c_Actinobacteria;o_Actinomycetales;f_Micrococcaceae;g_Micrococcus                | 0,0000 | 0 | 0,0088 | 5 | 0,0000 | 0  | 0,0000 | 0 | 0,0000 | 0 | 0,0000 | 0 | 0,0015 | 5  | 0,00 |
| k_Bacteria;p_Actinobacteria;c_Actinobacteria;o_Actinomycetales;f_Micrococcaceae;g_Renibacterium              | 0,0000 | 0 | 0,0088 | 5 | 0,0000 | 0  | 0,0000 | 0 | 0,0000 | 0 | 0,0000 | 0 | 0,0015 | 5  | 0,00 |
| k_Bacteria;p_Proteobacteria;c_Deltaproteobacteria;o_Desulfobacterales;f_Desulfobacteraceae;g_Desulfobacter   | 0,0000 | 0 | 0,0088 | 5 | 0,0000 | 0  | 0,0000 | 0 | 0,0000 | 0 | 0,0000 | 0 | 0,0015 | 5  | 0,00 |
| k_Bacteria;p_Proteobacteria;c_Gammaproteobacteria;o_Pasteurellales;f_Pasteurellaceae;Other                   | 0,0000 | 0 | 0,0088 | 5 | 0,0000 | 0  | 0,0000 | 0 | 0,0000 | 0 | 0,0000 | 0 | 0,0015 | 5  | 0,00 |
| k_Bacteria;p_TM7;c_TM7-1;o_f_;g_                                                                             | 0,0000 | 0 | 0,0088 | 5 | 0,0000 | 0  | 0,0000 | 0 | 0,0000 | 0 | 0,0000 | 0 | 0,0015 | 5  | 0,00 |
| k_Bacteria;p_Plantomycetes;c_Phycisphaerae;o_MSB19;f_;g_                                                     | 0,0000 | 0 | 0,0000 | 0 | 0,0086 | 6  | 0,0000 | 0 | 0,0000 | 0 | 0,0000 | 0 | 0,0014 | 6  | 0,00 |
| k_Bacteria;p_Proteobacteria;c_Alphaproteobacteria;o_Rhizobiales;f_Methylcystaceae;g_                         | 0,0000 | 0 | 0,0000 | 0 | 0,0086 | 6  | 0,0000 | 0 | 0,0000 | 0 | 0,0000 | 0 | 0,0014 | 6  | 0,00 |
| k_Bacteria;p_Proteobacteria;c_Betaproteobacteria;o_Gallionellales;f_Gallionellaceae;g_Gallionella            | 0,0000 | 0 | 0,0000 | 0 | 0,0086 | 6  | 0,0000 | 0 | 0,0000 | 0 | 0,0000 | 0 | 0,0014 | 6  | 0,00 |
| k_Bacteria;p_Actinobacteria;c_Actinobacteria;o_Actinomycetales;f_Microbacteriaceae;g_                        | 0,0000 | 0 | 0,0000 | 0 | 0,0000 | 0  | 0,0000 | 0 | 0,0081 | 2 | 0,0000 | 0 | 0,0014 | 2  | 0,00 |
| k_Bacteria;p_Firmicutes;c_Bacilli;o_Bacillales;f_Paenibacillaceae;g_Brevibacillus                            | 0,0000 | 0 | 0,0000 | 0 | 0,0000 | 0  | 0,0000 | 0 | 0,0081 | 2 | 0,0000 | 0 | 0,0014 | 2  | 0,00 |
| k_Bacteria;p_Fusobacteria;c_Fusobacteriia;o_Fusobacteriales;f_Leptotrichiaceae;g_Leptotrichia                | 0,0000 | 0 | 0,0000 | 0 | 0,0000 | 0  | 0,0000 | 0 | 0,0081 | 2 | 0,0000 | 0 | 0,0014 | 2  | 0,00 |
| k_Bacteria;p_Proteobacteria;c_Alphaproteobacteria;o_Rhodospirillales;f_Rhodospirillaceae;g_Azospirillum      | 0,0000 | 0 | 0,0000 | 0 | 0,0000 | 0  | 0,0000 | 0 | 0,0081 | 2 | 0,0000 | 0 | 0,0014 | 2  | 0,00 |
| k_Bacteria;p_Plantomycetes;c_SBZP_4958;o_f_;g_                                                               | 0,0000 | 0 | 0,0000 | 0 | 0,0000 | 0  | 0,0000 | 0 | 0,0000 | 0 | 0,0080 | 4 | 0,0013 | 4  | 0,00 |
| k_Bacteria;p_Verrucomicrobia;c_Opitutae;o_Punicelcoccaceae;f_Punicelcoccaceae;g_                             | 0,0000 | 0 | 0,0000 | 0 | 0,0000 | 0  | 0,0000 | 0 | 0,0000 | 0 | 0,0080 | 4 | 0,0013 | 4  | 0,00 |
| k_Bacteria;p_Firmicutes;c_Clostridia;o_Clostridiales;f_Veillonellaceae;g_Dialister                           | 0,0000 | 0 | 0,0000 | 0 | 0,0057 | 4  | 0,0000 | 0 | 0,0000 | 0 | 0,0020 | 1 | 0,0013 | 5  | 0,00 |
| k_Bacteria;p_Bacteroidetes;c_Flavobacteriia;o_Flavobacteriales;f_[Weeksellaceae];g_Chryseobacterium          | 0,0036 | 1 | 0,0000 | 0 | 0,0000 | 0  | 0,0000 | 0 | 0,0041 | 1 | 0,0000 | 0 | 0,0013 | 2  | 0,00 |
| k_Bacteria;p_Bacteroidetes;c_Cytophagia;o_Cytophagales;f_Flammeovirgaceae;g_Reichenbachiella                 | 0,0073 | 2 | 0,0000 | 0 | 0,0000 | 0  | 0,0000 | 0 | 0,0000 | 0 | 0,0000 | 0 | 0,0012 | 2  | 0,00 |

|                                                                                                                                |        |   |        |   |        |   |        |   |        |   |        |   |        |   |      |
|--------------------------------------------------------------------------------------------------------------------------------|--------|---|--------|---|--------|---|--------|---|--------|---|--------|---|--------|---|------|
| k_Bacteria;p_Firmicutes;c_Bacilli;o_Bacillales;f_Staphylococcaceae;g_Macroccoccus                                              | 0,0073 | 2 | 0,0000 | 0 | 0,0000 | 0 | 0,0000 | 0 | 0,0000 | 0 | 0,0000 | 0 | 0,0012 | 2 | 0,00 |
| k_Bacteria;p_Firmicutes;c_Clostridia;o_Clostridiales;f_[Mogibacteriaceae];g__                                                  | 0,0073 | 2 | 0,0000 | 0 | 0,0000 | 0 | 0,0000 | 0 | 0,0000 | 0 | 0,0000 | 0 | 0,0012 | 2 | 0,00 |
| k_Bacteria;p_GN02;c_3BR-5F;o_f_g__                                                                                             | 0,0073 | 2 | 0,0000 | 0 | 0,0000 | 0 | 0,0000 | 0 | 0,0000 | 0 | 0,0000 | 0 | 0,0012 | 2 | 0,00 |
| k_Bacteria;p_Proteobacteria;c_Alphaproteobacteria;o_Rhizobiales;f_Bradyrhizobiaceae;g_Bradyrhizobium                           | 0,0073 | 2 | 0,0000 | 0 | 0,0000 | 0 | 0,0000 | 0 | 0,0000 | 0 | 0,0000 | 0 | 0,0012 | 2 | 0,00 |
| k_Bacteria;p_Proteobacteria;c_Alphaproteobacteria;o_Rhizobiales;f_Hyphomicrobiaceae;g_Devosia                                  | 0,0073 | 2 | 0,0000 | 0 | 0,0000 | 0 | 0,0000 | 0 | 0,0000 | 0 | 0,0000 | 0 | 0,0012 | 2 | 0,00 |
| k_Bacteria;p_Proteobacteria;c_Gammaproteobacteria;o_Alteromonadales;f_Idiomarinaceae;g__                                       | 0,0073 | 2 | 0,0000 | 0 | 0,0000 | 0 | 0,0000 | 0 | 0,0000 | 0 | 0,0000 | 0 | 0,0012 | 2 | 0,00 |
| k_Bacteria;p_Verrucomicrobia;c_[Pedosphaerae];o_f_g__                                                                          | 0,0073 | 2 | 0,0000 | 0 | 0,0000 | 0 | 0,0000 | 0 | 0,0000 | 0 | 0,0000 | 0 | 0,0012 | 2 | 0,00 |
| k_Bacteria;p_Bacteroidetes;c_[Saprosipirae];o_[Saprosipirales];f_Chitinophagaceae;g_Niabella                                   | 0,0000 | 0 | 0,0000 | 0 | 0,0071 | 5 | 0,0000 | 0 | 0,0000 | 0 | 0,0000 | 0 | 0,0012 | 5 | 0,00 |
| k_Bacteria;p_Proteobacteria;c_Betaproteobacteria;o_Neisseriales;f_Neisseriaceae;g__                                            | 0,0000 | 0 | 0,0000 | 0 | 0,0071 | 5 | 0,0000 | 0 | 0,0000 | 0 | 0,0000 | 0 | 0,0012 | 5 | 0,00 |
| k_Bacteria;p_Actinobacteria;c_Actinobacteria;o_Actinomycetales;f_Frankiaceae;g__                                               | 0,0000 | 0 | 0,0071 | 4 | 0,0000 | 0 | 0,0000 | 0 | 0,0000 | 0 | 0,0000 | 0 | 0,0012 | 4 | 0,00 |
| k_Bacteria;p_Bacteroidetes;c_Bacteroidia;o_Bacteroidales;f_Porphyrimonadaceae;g__                                              | 0,0000 | 0 | 0,0071 | 4 | 0,0000 | 0 | 0,0000 | 0 | 0,0000 | 0 | 0,0000 | 0 | 0,0012 | 4 | 0,00 |
| k_Bacteria;p_Bacteroidetes;c_Flavobacteria;o_Flavobacteriales;f_Flavobacteriaceae;g_Nonlabens                                  | 0,0000 | 0 | 0,0071 | 4 | 0,0000 | 0 | 0,0000 | 0 | 0,0000 | 0 | 0,0000 | 0 | 0,0012 | 4 | 0,00 |
| k_Bacteria;p_Cyanobacteria;c_Oscillatoriohycidae;o_Oscillatoriales;f_Phormidiaceae;g_Microcoleus                               | 0,0000 | 0 | 0,0000 | 0 | 0,0029 | 2 | 0,0000 | 0 | 0,0041 | 1 | 0,0000 | 0 | 0,0012 | 3 | 0,00 |
| k_Bacteria;p_Bacteroidetes;c_Bacteroidia;o_Bacteroidales;f_Marinilabiaceae;g__                                                 | 0,0000 | 0 | 0,0000 | 0 | 0,0000 | 0 | 0,0000 | 0 | 0,0000 | 0 | 0,0060 | 3 | 0,0010 | 3 | 0,00 |
| k_Bacteria;p_Fibrobacteres;c_Fibrobacteria;o_Fibrobacteriales;f_g__                                                            | 0,0000 | 0 | 0,0000 | 0 | 0,0000 | 0 | 0,0000 | 0 | 0,0000 | 0 | 0,0060 | 3 | 0,0010 | 3 | 0,00 |
| k_Bacteria;p_Firmicutes;c_Clostridia;o_Clostridiales;f_[Tissierellaceae];g_WAL_1855D                                           | 0,0000 | 0 | 0,0000 | 0 | 0,0000 | 0 | 0,0000 | 0 | 0,0000 | 0 | 0,0060 | 3 | 0,0010 | 3 | 0,00 |
| k_Bacteria;p_Proteobacteria;c_Gammaproteobacteria;o_Alteromonadales;f_[Chromatiaceae];Other                                    | 0,0000 | 0 | 0,0000 | 0 | 0,0000 | 0 | 0,0000 | 0 | 0,0000 | 0 | 0,0060 | 3 | 0,0010 | 3 | 0,00 |
| k_Bacteria;p_Proteobacteria;c_Gammaproteobacteria;o_Enterobacteriales;f_Enterobacteriaceae;g_Gluconacetobacter                 | 0,0000 | 0 | 0,0000 | 0 | 0,0000 | 0 | 0,0000 | 0 | 0,0000 | 0 | 0,0060 | 3 | 0,0010 | 3 | 0,00 |
| k_Bacteria;p_Verrucomicrobia;c_Opitutae;o_HA64;f_g__                                                                           | 0,0000 | 0 | 0,0000 | 0 | 0,0000 | 0 | 0,0000 | 0 | 0,0000 | 0 | 0,0060 | 3 | 0,0010 | 3 | 0,00 |
| k_Bacteria;p_Proteobacteria;c_Alphaproteobacteria;o_Sphingomonadales;f_Sphingomonadaceae;g_Sphingobium                         | 0,0000 | 0 | 0,0018 | 1 | 0,0000 | 0 | 0,0000 | 0 | 0,0041 | 1 | 0,0000 | 0 | 0,0010 | 2 | 0,00 |
| k_Bacteria;p_Proteobacteria;c_Gammaproteobacteria;o_Cardiobacteriales;f_g__                                                    | 0,0000 | 0 | 0,0018 | 1 | 0,0000 | 0 | 0,0000 | 0 | 0,0000 | 0 | 0,0040 | 2 | 0,0010 | 3 | 0,00 |
| k_Bacteria;p_Firmicutes;c_Bacilli;o_Lactobacillales;f_Lactobacillaceae;g_Lactobacillus                                         | 0,0000 | 0 | 0,0000 | 0 | 0,0057 | 4 | 0,0000 | 0 | 0,0000 | 0 | 0,0000 | 0 | 0,0010 | 4 | 0,00 |
| k_Bacteria;p_Proteobacteria;c_Alphaproteobacteria;o_Rickettsiales;f_Rickettsiaceae;g_Rickettsia                                | 0,0000 | 0 | 0,0000 | 0 | 0,0057 | 4 | 0,0000 | 0 | 0,0000 | 0 | 0,0000 | 0 | 0,0010 | 4 | 0,00 |
| k_Bacteria;p_Proteobacteria;c_Gammaproteobacteria;o_Alteromonadales;f_Idiomarinaceae;g_Idiomarina                              | 0,0036 | 1 | 0,0000 | 0 | 0,0000 | 0 | 0,0000 | 0 | 0,0000 | 0 | 0,0020 | 1 | 0,0009 | 2 | 0,00 |
| k_Bacteria;p_Proteobacteria;c_Alphaproteobacteria;o_Rhizobiales;f_Hyphomicrobiaceae;Other                                      | 0,0000 | 0 | 0,0035 | 2 | 0,0000 | 0 | 0,0000 | 0 | 0,0000 | 0 | 0,0020 | 1 | 0,0009 | 3 | 0,00 |
| k_Bacteria;p_Cyanobacteria;c_Oscillatoriohycidae;o_Oscillatoriales;Other                                                       | 0,0036 | 1 | 0,0018 | 1 | 0,0000 | 0 | 0,0000 | 0 | 0,0000 | 0 | 0,0000 | 0 | 0,0009 | 2 | 0,00 |
| k_Bacteria;p_Acidobacteria;c_RB25;o_f_g__                                                                                      | 0,0000 | 0 | 0,0053 | 3 | 0,0000 | 0 | 0,0000 | 0 | 0,0000 | 0 | 0,0000 | 0 | 0,0009 | 3 | 0,00 |
| k_Bacteria;p_Actinobacteria;c_Actinobacteria;o_Actinomycetales;f_Promicromonosporaceae;g_Xylanimicrobium                       | 0,0000 | 0 | 0,0053 | 3 | 0,0000 | 0 | 0,0000 | 0 | 0,0000 | 0 | 0,0000 | 0 | 0,0009 | 3 | 0,00 |
| k_Bacteria;p_Chlamydiae;c_Chlamydia;o_Chlamydiales;f_Rhabdochlamydiaceae;g_Candidatus Rhabdochlamydia                          | 0,0000 | 0 | 0,0053 | 3 | 0,0000 | 0 | 0,0000 | 0 | 0,0000 | 0 | 0,0000 | 0 | 0,0009 | 3 | 0,00 |
| k_Bacteria;p_Chloroflexi;c_Anaerolineae;o_SBR1031;f_SHA-31;g__                                                                 | 0,0000 | 0 | 0,0053 | 3 | 0,0000 | 0 | 0,0000 | 0 | 0,0000 | 0 | 0,0000 | 0 | 0,0009 | 3 | 0,00 |
| k_Bacteria;p_PAUC34;c_o_f_g__                                                                                                  | 0,0000 | 0 | 0,0053 | 3 | 0,0000 | 0 | 0,0000 | 0 | 0,0000 | 0 | 0,0000 | 0 | 0,0009 | 3 | 0,00 |
| k_Bacteria;p_Proteobacteria;c_Betaproteobacteria;o_Burkholderiales;f_Oxalobacteraceae;Other                                    | 0,0000 | 0 | 0,0053 | 3 | 0,0000 | 0 | 0,0000 | 0 | 0,0000 | 0 | 0,0000 | 0 | 0,0009 | 3 | 0,00 |
| k_Bacteria;p_Chlamydiae;c_Chlamydia;o_Chlamydiales;f_g__                                                                       | 0,0000 | 0 | 0,0035 | 2 | 0,0014 | 1 | 0,0000 | 0 | 0,0000 | 0 | 0,0000 | 0 | 0,0008 | 3 | 0,00 |
| k_Bacteria;p_Plantomycetes;c_028H05-P-BN-P5;o_f_g__                                                                            | 0,0000 | 0 | 0,0000 | 0 | 0,0000 | 0 | 0,0048 | 1 | 0,0000 | 0 | 0,0000 | 0 | 0,0008 | 1 | 0,00 |
| k_Bacteria;p_Proteobacteria;c_Alphaproteobacteria;o_Sphingomonadales;f_Erythrobacteraceae;Other                                | 0,0000 | 0 | 0,0000 | 0 | 0,0000 | 0 | 0,0048 | 1 | 0,0000 | 0 | 0,0000 | 0 | 0,0008 | 1 | 0,00 |
| k_Bacteria;p_Verrucomicrobia;c_[Spartobacteria];o_[Chthoniobacteriales];f_[Chthoniobacteraceae];Other                          | 0,0000 | 0 | 0,0000 | 0 | 0,0000 | 0 | 0,0048 | 1 | 0,0000 | 0 | 0,0000 | 0 | 0,0008 | 1 | 0,00 |
| k_Bacteria;p_Actinobacteria;c_Actinobacteria;o_Actinomycetales;f_Sporichthyaceae;g__                                           | 0,0000 | 0 | 0,0000 | 0 | 0,0043 | 3 | 0,0000 | 0 | 0,0000 | 0 | 0,0000 | 0 | 0,0007 | 3 | 0,00 |
| k_Bacteria;p_Firmicutes;c_Clostridia;o_Clostridiales;f_Symbiobacteriaceae;g_Symbiobacterium                                    | 0,0000 | 0 | 0,0000 | 0 | 0,0043 | 3 | 0,0000 | 0 | 0,0000 | 0 | 0,0000 | 0 | 0,0007 | 3 | 0,00 |
| k_Bacteria;p_Actinobacteria;c_Actinobacteria;o_Actinomycetales;f_Micrococccaceae;g_Rothia                                      | 0,0000 | 0 | 0,0000 | 0 | 0,0000 | 0 | 0,0000 | 0 | 0,0041 | 1 | 0,0000 | 0 | 0,0007 | 1 | 0,00 |
| k_Bacteria;p_Bacteroidetes;c_[Saprosipirae];o_[Saprosipirales];f_Chitinophagaceae;g_Flavosolbacter                             | 0,0000 | 0 | 0,0000 | 0 | 0,0000 | 0 | 0,0000 | 0 | 0,0041 | 1 | 0,0000 | 0 | 0,0007 | 1 | 0,00 |
| k_Bacteria;p_Cyanobacteria;c_Nostocophycidae;o_Nostocales;f_g__                                                                | 0,0000 | 0 | 0,0000 | 0 | 0,0000 | 0 | 0,0000 | 0 | 0,0041 | 1 | 0,0000 | 0 | 0,0007 | 1 | 0,00 |
| k_Bacteria;p_Cyanobacteria;c_Synechococcophycidae;o_Synechococcales;f_Acaryochloridaceae;g_Acaryochloris                       | 0,0000 | 0 | 0,0000 | 0 | 0,0000 | 0 | 0,0000 | 0 | 0,0041 | 1 | 0,0000 | 0 | 0,0007 | 1 | 0,00 |
| k_Bacteria;p_Cyanobacteria;c_Nostocophycidae;o_Nostocales;f_Nostocaceae;g__                                                    | 0,0000 | 0 | 0,0000 | 0 | 0,0000 | 0 | 0,0000 | 0 | 0,0000 | 0 | 0,0040 | 2 | 0,0007 | 2 | 0,00 |
| k_Bacteria;p_Cyanobacteria;c_Synechococcophycidae;o_Synechococcales;Other;Other                                                | 0,0000 | 0 | 0,0000 | 0 | 0,0000 | 0 | 0,0000 | 0 | 0,0000 | 0 | 0,0040 | 2 | 0,0007 | 2 | 0,00 |
| k_Bacteria;p_Proteobacteria;c_Alphaproteobacteria;o_Rhodobacteriales;f_Hyphomonadaceae;g_Oceaniculis                           | 0,0000 | 0 | 0,0000 | 0 | 0,0000 | 0 | 0,0000 | 0 | 0,0000 | 0 | 0,0040 | 2 | 0,0007 | 2 | 0,00 |
| k_Bacteria;p_Proteobacteria;c_Betaproteobacteria;o_Nitrosomonadales;f_Nitrosomonadaceae;Other                                  | 0,0000 | 0 | 0,0000 | 0 | 0,0000 | 0 | 0,0000 | 0 | 0,0000 | 0 | 0,0040 | 2 | 0,0007 | 2 | 0,00 |
| k_Bacteria;p_Actinobacteria;c_Actinobacteria;o_Actinomycetales;f_Dietziaceae;g_Dietzia                                         | 0,0036 | 1 | 0,0000 | 0 | 0,0000 | 0 | 0,0000 | 0 | 0,0000 | 0 | 0,0000 | 0 | 0,0006 | 1 | 0,00 |
| k_Bacteria;p_Proteobacteria;c_Deltaproteobacteria;o_NB1-j;Other;Other                                                          | 0,0036 | 1 | 0,0000 | 0 | 0,0000 | 0 | 0,0000 | 0 | 0,0000 | 0 | 0,0000 | 0 | 0,0006 | 1 | 0,00 |
| k_Bacteria;p_Proteobacteria;c_Deltaproteobacteria;o_Sva0853;f_SAR324;g__                                                       | 0,0036 | 1 | 0,0000 | 0 | 0,0000 | 0 | 0,0000 | 0 | 0,0000 | 0 | 0,0000 | 0 | 0,0006 | 1 | 0,00 |
| k_Bacteria;p_Proteobacteria;c_Gammaproteobacteria;o_Chromatiales;f_Halotheobacillaceae;g_Halotheobacillus                      | 0,0036 | 1 | 0,0000 | 0 | 0,0000 | 0 | 0,0000 | 0 | 0,0000 | 0 | 0,0000 | 0 | 0,0006 | 1 | 0,00 |
| k_Bacteria;p_Verrucomicrobia;c_[Spartobacteria];o_[Chthoniobacteriales];f_[Chthoniobacteraceae];g_Candidatus Xiphinematobacter | 0,0036 | 1 | 0,0000 | 0 | 0,0000 | 0 | 0,0000 | 0 | 0,0000 | 0 | 0,0000 | 0 | 0,0006 | 1 | 0,00 |
| k_Bacteria;p_AC1;c_B04R032;o_f_g__                                                                                             | 0,0000 | 0 | 0,0035 | 2 | 0,0000 | 0 | 0,0000 | 0 | 0,0000 | 0 | 0,0000 | 0 | 0,0006 | 2 | 0,00 |
| k_Bacteria;p_Chloroflexi;c_Ellin6529;o_f_g__                                                                                   | 0,0000 | 0 | 0,0035 | 2 | 0,0000 | 0 | 0,0000 | 0 | 0,0000 | 0 | 0,0000 | 0 | 0,0006 | 2 | 0,00 |
| k_Bacteria;p_Firmicutes;c_Clostridia;o_Clostridiales;f_[Acidaminobacteraceae];g_Fusibacter                                     | 0,0000 | 0 | 0,0035 | 2 | 0,0000 | 0 | 0,0000 | 0 | 0,0000 | 0 | 0,0000 | 0 | 0,0006 | 2 | 0,00 |
| k_Bacteria;p_GN02;c_BD1-5;o_f_g__                                                                                              | 0,0000 | 0 | 0,0035 | 2 | 0,0000 | 0 | 0,0000 | 0 | 0,0000 | 0 | 0,0000 | 0 | 0,0006 | 2 | 0,00 |
| k_Bacteria;p_TM7;c_TM7-3;o_f_g__                                                                                               | 0,0000 | 0 | 0,0035 | 2 | 0,0000 | 0 | 0,0000 | 0 | 0,0000 | 0 | 0,0000 | 0 | 0,0006 | 2 | 0,00 |
| k_Bacteria;p_Proteobacteria;c_Alphaproteobacteria;o_Rickettsiales;f_Pelagibacteraceae;g__                                      | 0,0000 | 0 | 0,0000 | 0 | 0,0014 | 1 | 0,0000 | 0 | 0,0000 | 0 | 0,0020 | 1 | 0,0006 | 2 | 0,00 |
| k_Bacteria;p_Proteobacteria;c_Gammaproteobacteria;o_Enterobacteriales;f_Enterobacteriaceae;g_Serratia                          | 0,0000 | 0 | 0,0018 | 1 | 0,0014 | 1 | 0,0000 | 0 | 0,0000 | 0 | 0,0000 | 0 | 0,0005 | 2 | 0,00 |
| k_Bacteria;p_SAR406;c_AB16;o_Arcti96B-7;f_A714017;g_ZA3312c                                                                    | 0,0000 | 0 | 0,0018 | 1 | 0,0014 | 1 | 0,0000 | 0 | 0,0000 | 0 | 0,0000 | 0 | 0,0005 | 2 | 0,00 |
| k_Bacteria;p_Actinobacteria;c_Actinobacteria;o_Actinomycetales;f_Streptomycetaceae;g_Streptomyces                              | 0,0000 | 0 | 0,0000 | 0 | 0,0029 | 2 | 0,0000 | 0 | 0,0000 | 0 | 0,0000 | 0 | 0,0005 | 2 | 0,00 |
| k_Bacteria;p_Fusobacteria;c_Fusobacteria;o_Fusobacteriales;f_g__                                                               | 0,0000 | 0 | 0,0000 | 0 | 0,0029 | 2 | 0,0000 | 0 | 0,0000 | 0 | 0,0000 | 0 | 0,0005 | 2 | 0,00 |
| k_Bacteria;p_Proteobacteria;c_Betaproteobacteria;o_Burkholderiales;f_Oxalobacteraceae;g__                                      | 0,0000 | 0 | 0,0000 | 0 | 0,0029 | 2 | 0,0000 | 0 | 0,0000 | 0 | 0,0000 | 0 | 0,0005 | 2 | 0,00 |
| k_Bacteria;p_Proteobacteria;c_Deltaproteobacteria;o_Syntrophobacteriales;f_Syntrophobacteraceae;g__                            | 0,0000 | 0 | 0,0000 | 0 | 0,0029 | 2 | 0,0000 | 0 | 0,0000 | 0 | 0,0000 | 0 | 0,0005 | 2 | 0,00 |
| k_Bacteria;p_Proteobacteria;c_Gammaproteobacteria;o_Pseudomonadales;f_Moraxellaceae;g__                                        | 0,0000 | 0 | 0,0000 | 0 | 0,0029 | 2 | 0,0000 | 0 | 0,0000 | 0 | 0,0000 | 0 | 0,0005 | 2 | 0,00 |
| k_Bacteria;p_Proteobacteria;c_Alphaproteobacteria;o_Rhodospirillales;f_Rhodospirillaceae;Other                                 | 0,0000 | 0 | 0,0000 | 0 | 0,0000 | 0 | 0,0000 | 0 | 0,0000 | 0 | 0,0020 | 1 | 0,0003 | 1 | 0,00 |
| k_Bacteria;p_Plantomycetes;c_vadinHA49;o_f_g__                                                                                 | 0,0000 | 0 | 0,0018 | 1 | 0,0000 | 0 | 0,0000 | 0 | 0,0000 | 0 | 0,0000 | 0 | 0,0003 | 1 | 0,00 |
| k_Bacteria;p_Proteobacteria;c_Alphaproteobacteria;o_Rhodobacteriales;f_Rhodobacteraceae;g_Antarcticicola                       | 0,0000 | 0 | 0,0018 | 1 | 0,0000 | 0 | 0,0000 | 0 | 0,0000 | 0 | 0,0000 | 0 | 0,0003 | 1 | 0,00 |
| k_Bacteria;p_Proteobacteria;c_Deltaproteobacteria;o_Syntrophobacteriales;f_g__                                                 | 0,0000 | 0 | 0,0018 | 1 | 0,0000 | 0 | 0,0000 | 0 | 0,0000 | 0 | 0,0000 | 0 | 0,0003 | 1 | 0,00 |
| k_Bacteria;p_Proteobacteria;c_Gammaproteobacteria;o_Alteromonadales;f_Ferrimonas                                               | 0,0000 | 0 | 0,0018 | 1 | 0,0000 | 0 | 0,0000 | 0 | 0,0000 | 0 | 0,0000 | 0 | 0,0003 | 1 | 0,00 |



|                                                                                                            |        |   |        |   |        |   |        |   |        |   |        |   |        |   |      |
|------------------------------------------------------------------------------------------------------------|--------|---|--------|---|--------|---|--------|---|--------|---|--------|---|--------|---|------|
| k__Bacteria;p__Bacteroidetes;c__Flavobacteriia;o__Flavobacteriales;f__Flavobacteriaceae;g__Sediminicola    | 0,0000 | 0 | 0,0000 | 0 | 0,0014 | 1 | 0,0000 | 0 | 0,0000 | 0 | 0,0000 | 0 | 0,0002 | 1 | 0,00 |
| k__Bacteria;p__Cyanobacteria;c__Oscillatoriothycideae;o__Chroococcales;f__Cyanobacteriaceae;g__Cyanothecae | 0,0000 | 0 | 0,0000 | 0 | 0,0014 | 1 | 0,0000 | 0 | 0,0000 | 0 | 0,0000 | 0 | 0,0002 | 1 | 0,00 |
| k__Bacteria;p__Firmicutes;c__Bacilli;o__Bacillales;f__Planococcaceae;g__Planomicrobium                     | 0,0000 | 0 | 0,0000 | 0 | 0,0014 | 1 | 0,0000 | 0 | 0,0000 | 0 | 0,0000 | 0 | 0,0002 | 1 | 0,00 |
| k__Bacteria;p__Proteobacteria;c__Gammaproteobacteria;o__Oceanospirillales;f__Halomonadaceae;Other          | 0,0000 | 0 | 0,0000 | 0 | 0,0014 | 1 | 0,0000 | 0 | 0,0000 | 0 | 0,0000 | 0 | 0,0002 | 1 | 0,00 |
